# Supplementary material for: An experimental and theoretical study of intramolecular regioselective oxidations of 6-substituted 2,3-dimethylquinoxaline derivatives
Source: Royal Society of Chemistry journal article supplement (doi:10.1039/c5nj03282b), 2016-01-01
Supplement: c5nj03282b1.pdf [file c5nj03282b1.pdf]

## Supplementary information

### Experimental and theoretical study of intramolecular regioselective oxidations of 6-substituted 2,3-dimethylquinoxaline derivatives

*Javier Peralta-Cruz,<sup>1</sup> Mónica Díaz-Fernández, Alberto Ávila-Castro*

Departamento de Química Orgánica, Escuela Nacional de Ciencias Biológicas del Instituto Politécnico Nacional, Carpio y plan de Ayala S/N, Colonia Santo Tomás, 11340 Ciudad de México, México.

*David Ortegón-Reyna, Armando Ariza-Castolo\**

Departamento de Química, Centro de Investigación y de Estudios Avanzados del Instituto Politécnico Nacional, Av. IPN 2508, San Pedro Zacatenco, 07360, Ciudad de México, México.

#### Content:

|                                                                  |     |
|------------------------------------------------------------------|-----|
| <b>I. General remarks and synthesis</b>                          | S3  |
| <b>II. Spectroscopy characterization</b>                         | S4  |
| II.a <sup>1</sup> H NMR spectrum analysis of Compound <b>1</b> . | S4  |
| II.b <sup>15</sup> N chemical shift determination                | S4  |
| 2,3-Dimethylquinoxaline ( <b>1</b> )                             | S5  |
| 2,3-Dimethyl-6-nitroquinoxaline ( <b>2</b> )                     | S6  |
| 2,3-Dimethyl-6-chloroquinoxaline ( <b>6</b> )                    | S7  |
| 2,3-Dimethyl-6-bromoquinoxaline ( <b>7</b> )                     | S8  |
| 2,3-Dimethylquinoxaline-6-carboxylic acid ( <b>8</b> )           | S9  |
| Methyl 2,3-dimethylquinoxaline-6-carboxylate ( <b>9</b> )        | S10 |
| (2,3-dimethyl-6-quinoxaliny)phenyl-methanone ( <b>10</b> )       | S11 |
| 2,2',3,3'-Tetramethyl-6,6'-biquinoxaline ( <b>11</b> )           | S12 |
| <b>III. Spectrometric NMR titration</b>                          | S13 |
| 2,3-Dimethylquinoxaline ( <b>1</b> )                             | S13 |
| 2,3-Dimethyl-6-nitroquinoxaline ( <b>2</b> )                     | S13 |
| 2,3-Dimethyl-6-chloroquinoxaline ( <b>6</b> )                    | S13 |
| 2,3-Dimethyl-6-bromoquinoxaline ( <b>7</b> )                     | S14 |
| 2,3-Dimethylquinoxaline-6-carboxylic acid ( <b>8</b> )           | S14 |

<sup>1</sup> Corresponding authors: [jperalta@ipn.mx](mailto:jperalta@ipn.mx), [aariza@cinvestav.mx](mailto:aariza@cinvestav.mx)

|                                                                                                                                                     |     |
|-----------------------------------------------------------------------------------------------------------------------------------------------------|-----|
| Methyl 2,3-dimethylquinoxaline-6-carboxylate ( <b>9</b> )                                                                                           | S14 |
| (2,3-dimethyl-6-quinoxaliny)phenyl-methanone ( <b>10</b> )                                                                                          | S15 |
| 2,2',3,3'-Tetramethyl-6,6'-biquinoxaline ( <b>11</b> )                                                                                              | S15 |
| <b>IV. Computational chemistry</b>                                                                                                                  | S16 |
| <b>Table 1S.</b> Bond length (Å) of 2,3-dimethyl-6R-quinoxalines optimized with DFT $\omega$ B97XD/6-311++(d,p) level theory                        | S16 |
| <b>Table 2S.</b> Angles ( $^{\circ}$ , $\angle_{NCC}$ ) of 2,3-dimethyl-6R-quinoxalines optimized with DFT $\omega$ B97XD/6-311++(d,p) level theory | S16 |
| 2,3-Dimethylquinoxaline ( <b>1</b> )                                                                                                                | S18 |
| 2,3-Dimethyl-6-nitroquinoxaline ( <b>2</b> )                                                                                                        | S20 |
| 6-carbonitrile-2,3-dimethylquinoxaline ( <b>3</b> )                                                                                                 | S22 |
| 2,3-Dimethyl-6-(trifluoromethyl)quinoxaline ( <b>4</b> )                                                                                            | S24 |
| 2,3-Dimethyl-6-fluoroquinoxaline ( <b>5</b> )                                                                                                       | S26 |
| 2,3-Dimethyl-6-chloroquinoxaline ( <b>6</b> )                                                                                                       | S28 |
| 2,3-Dimethyl-6-bromoquinoxaline ( <b>7</b> )                                                                                                        | S30 |
| 2,3-Dimethylquinoxaline-6-carboxylic acid ( <b>8</b> )                                                                                              | S32 |
| Methyl 2,3-dimethylquinoxaline-6-carboxylate ( <b>9</b> )                                                                                           | S34 |
| (2,3-dimethyl-6-quinoxaliny)phenyl-methanone ( <b>10</b> )                                                                                          | S36 |
| 2,2',3,3'-Tetramethyl-6,6'-biquinoxaline ( <b>11</b> )                                                                                              | S39 |
| 2,3-Dimethyl-6-methoxyquinoxaline ( <b>12</b> )                                                                                                     | S42 |
| 6-Hydroxy-2,3-dimethylquinoxaline ( <b>13</b> )                                                                                                     | S44 |
| 6-Amino-2,3-dimethylquinoxaline ( <b>14</b> )                                                                                                       | S46 |
| <b>References</b>                                                                                                                                   | S48 |

## I. General Remarks and synthesis

Scheme 1 of results and discussion section show the synthesis of compounds with a condensation of diamines with diketones and oxidation using the Wang *et al.* procedure. The regioisomer ratio of carbaldehydes mixtures **a**:**b** was determined by  $\delta^1\text{H}$  NMR spectra; however the regioisomer ratio of compounds **8** and **11** were estimated through a correlation between  $\delta^1\text{H}_9$  of 2,3-dimethyl-6-substituted-quinoxalines and percentage of regioisomer **b** (Figure 1S).

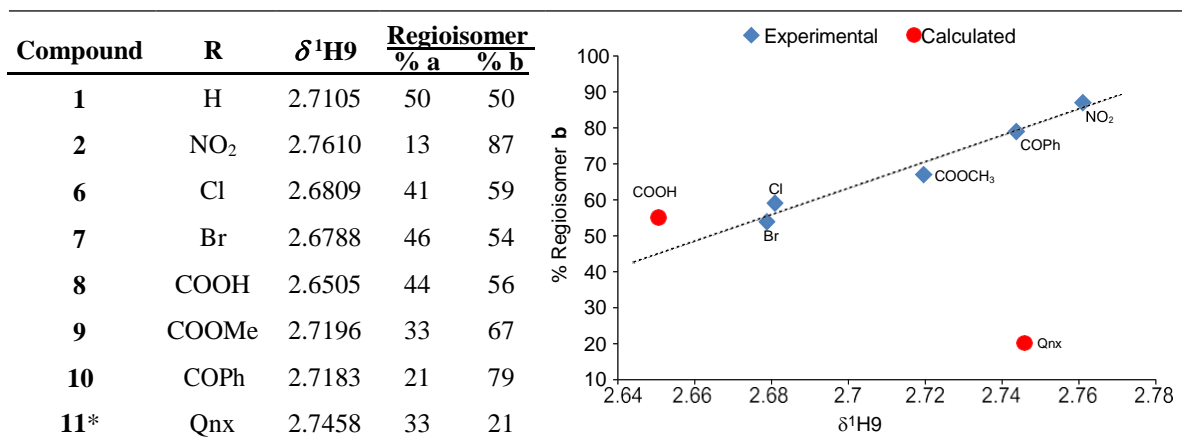

**Figure 1S.** Percentage ratio calculated from a linear relationship of  $\delta^1\text{H}_9$  vs. % regioisomers **b** obtained from synthesis. Compound **1** was not considered in the linear regression. \* In this compound the percentage of regioisomers is an approximation, only is considered a ratio of **a**:**b**.

The experimental and theoretical data analysis suggest that carbaldehydes of compound **11** is a mixture of three regioisomers **a**:**b**:**c** (Figure 2S) with a 5:3:7 proportional ratio respectively, however only was considered a ratio between **a** and **b** regioisomers for obtain an approximation of the regioisomer percentage, so that the regioisomer **c** was not considered.

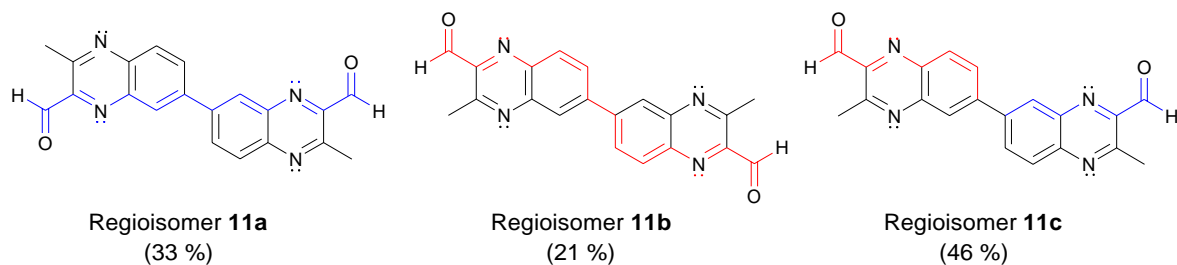

**Figure 2S.** Formation of the regioisomers **a**, **b** and **c** of compound **11**, suggested by experimental and theoretical analysis.

## II. Spectroscopy Characterization

### II.a $^1\text{H}$ NMR spectrum analysis of Compound 1.

The  $^1\text{H}$  NMR spectrum was assignment using the SpinWorks<sup>1</sup> software simulated with the NUMARIT algorithm.<sup>2</sup> The data reported in the experimental section were interactively fit to simulated spectrum. The second order AA'XX' spin-spin coupling system of the aromatic region is presented in above in black is the experimental spectrum and in red is the simulate one.

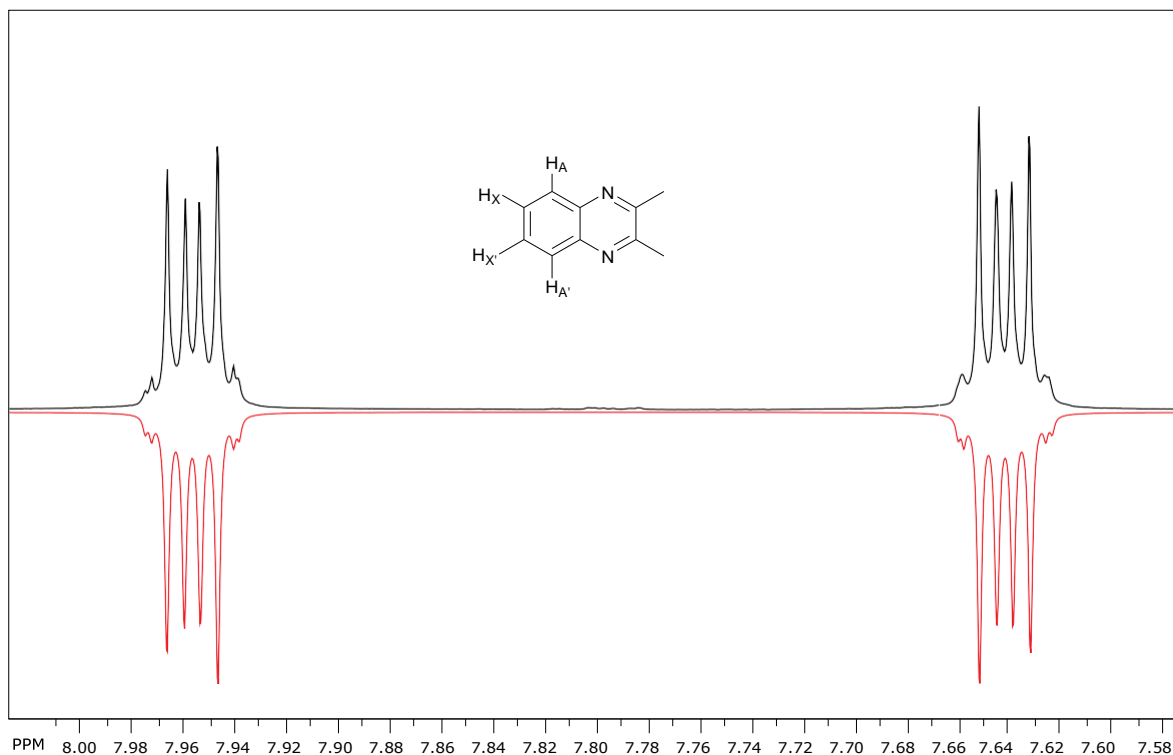

The experimental resolution of this spectrum was 0.3 Hz recorder at 500 MHz and the RMS = 0.25.  $\delta_{\text{H}} = 7.95$  and  $7.64$ ,  $^5J_{\text{H,H}}(\text{A},\text{A}') = 0.7 \pm 0.3$ ,  $^3J_{\text{H,H}}(\text{A},\text{X} = \text{A}'\text{X}') = 8.6 \pm 0.3$ ,  $^4J_{\text{H,H}}(\text{A},\text{X}' = \text{A}'\text{X}) = 1.3 \pm 0.3$  and  $^3J_{\text{H,H}}(\text{X},\text{X}') = 7.0 \pm 0.3$  Hz.

### II.b $^{15}\text{N}$ chemical shift determination

The  $^{15}\text{N}$  chemical shift of 2,3-dimethyl-6-substituted-quinoxalines were determined by indirect detection  $^1\text{H},^{15}\text{N}$  using the pfg-HMQC pulse sequence. In order to have a good resolution these spectra were determine in the aliphatic and aromatic regions separately in two spectra. In the methyl group region the  $^1\text{H}$  resolution was better than 5 Hz while in  $^{15}\text{N}$  the resolution was better than 2 Hz that correspond to 0.04 ppm. The best results were obtained with a  $J_{\text{H,N}} = 5$  Hz. The  $\delta_{\text{N}}$  were determine from the slice of the 2D spectra. For the aromatic region were used the same resolution with a  $J_{\text{H,N}} = 2$  Hz. Other acquisition parameter as show as example in the spectra slice of compound **6**, **10** and **11**. In some case were recorder too the 1D  $^{15}\text{N}$  NMR using single pulse decoupled as show for compound **2**.

## 2,3-Dimethylquinoxaline (1).

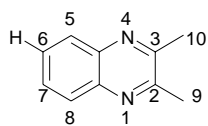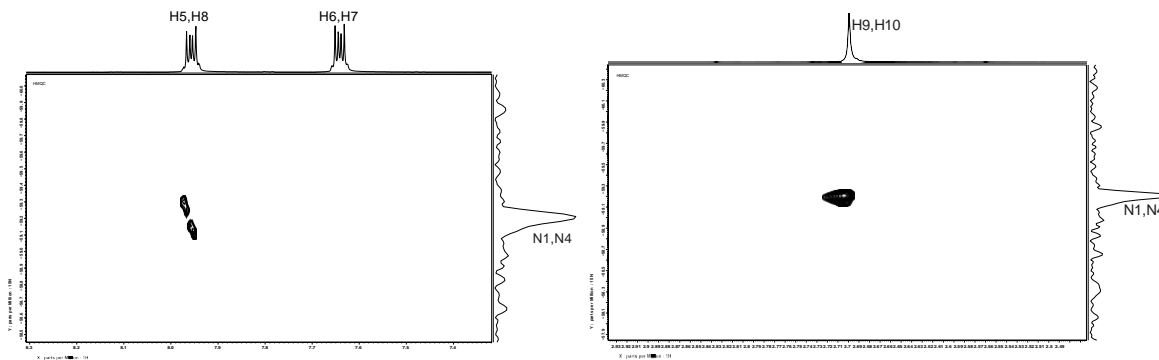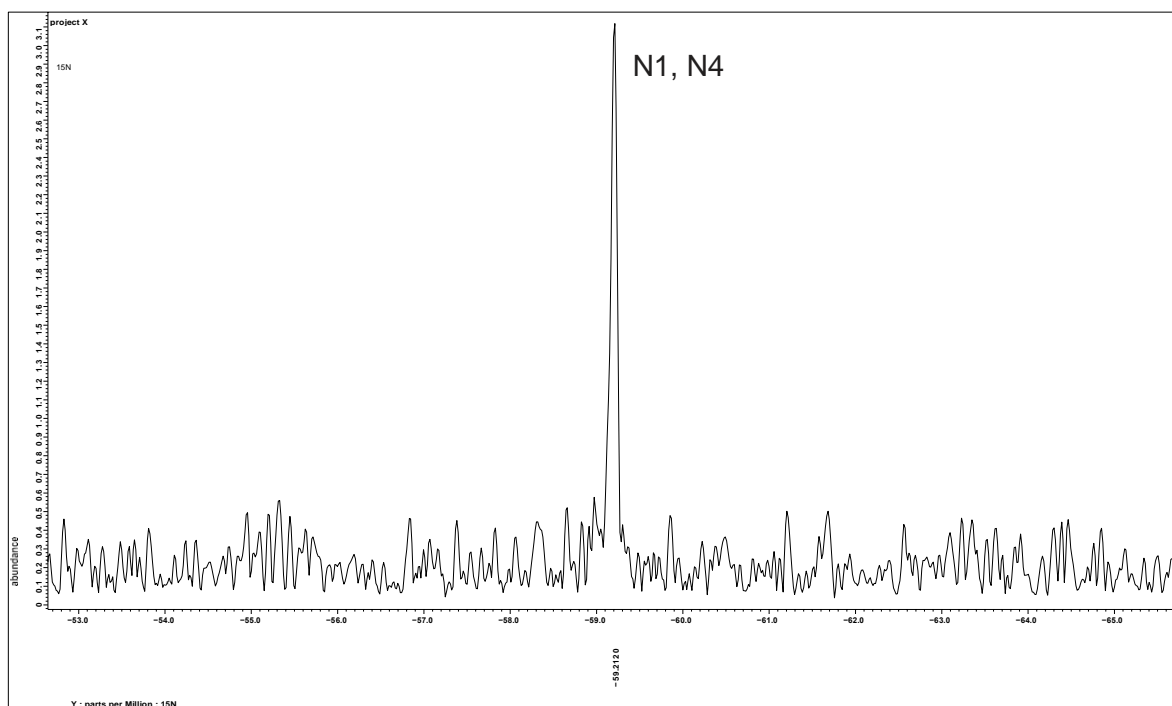

## 2,3-Dimethyl-6-nitroquinoline (2).

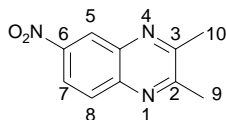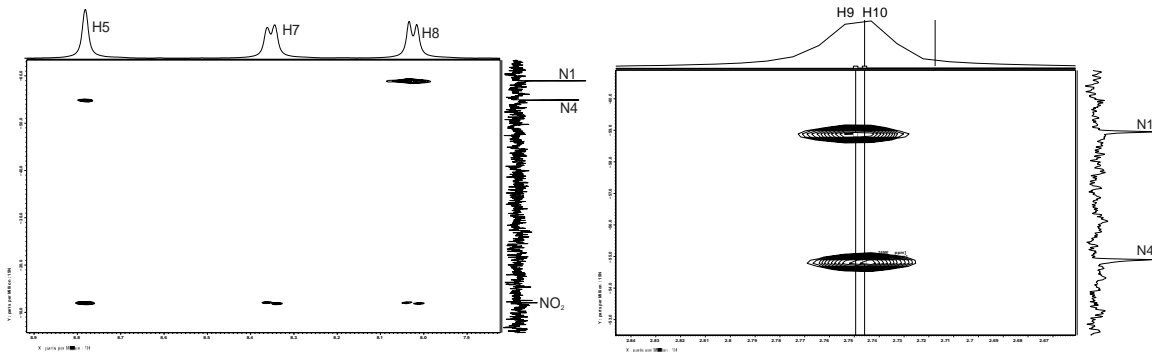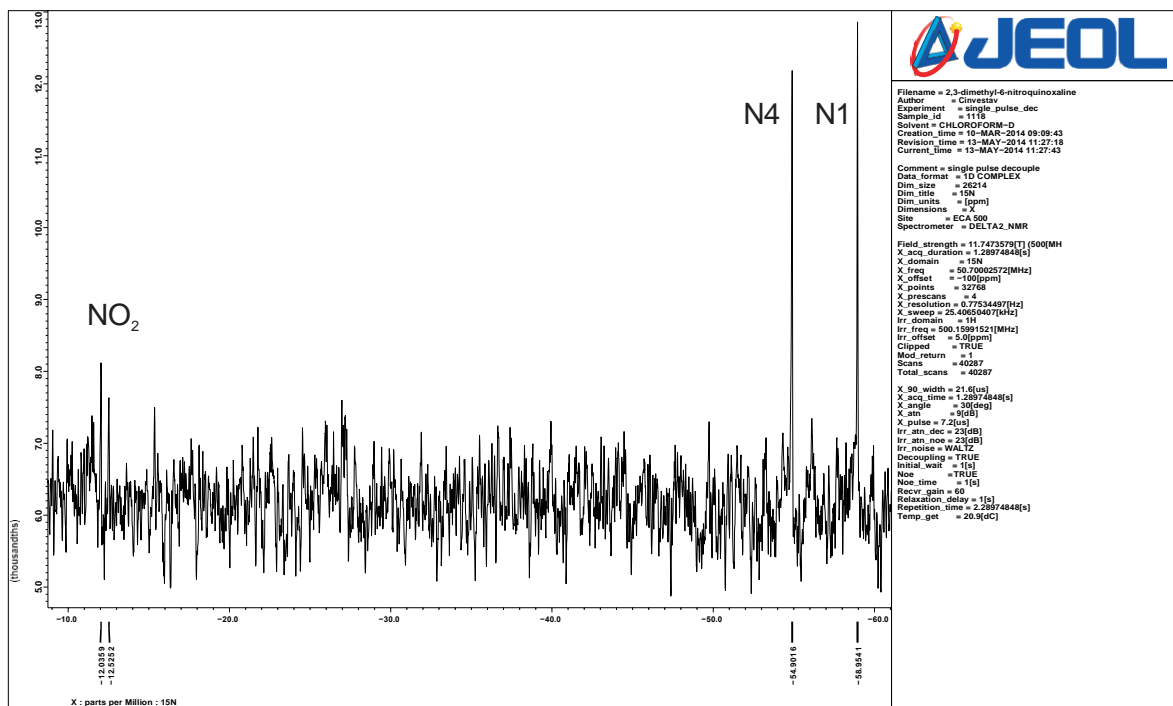

## 2,3-Dimethyl-6-chloroquinoxaline (6).

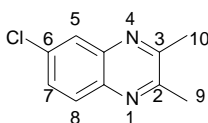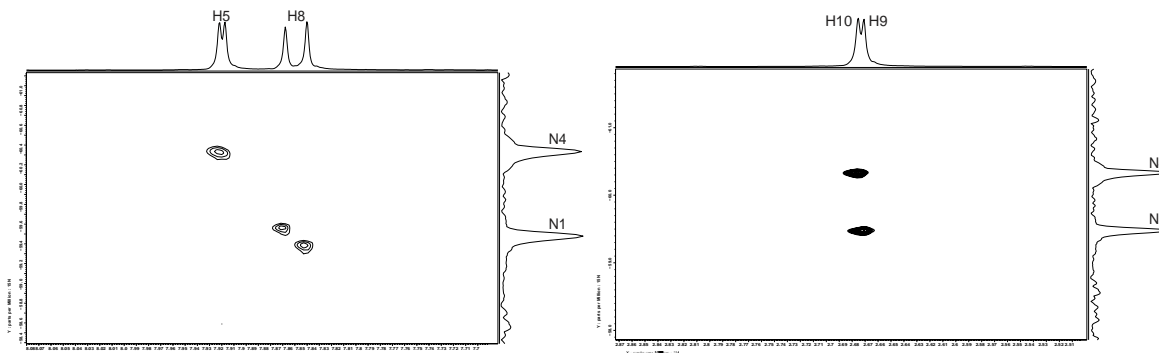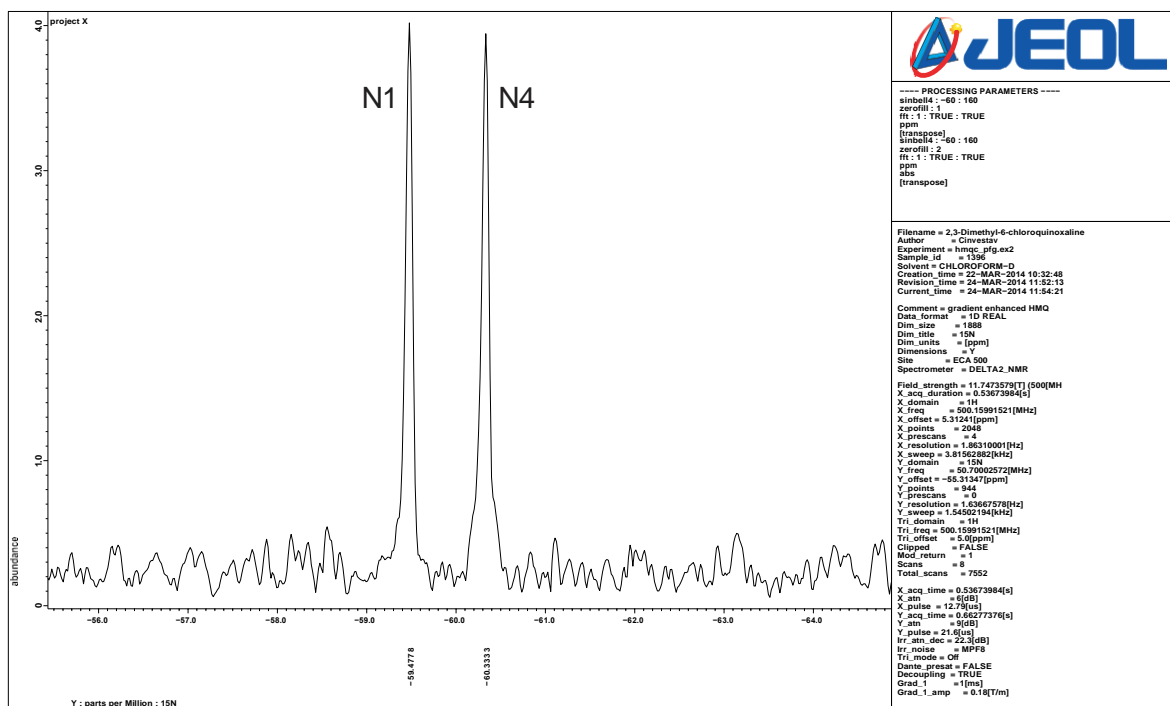

**JEOL**

----- PROCESSING PARAMETERS -----

sinbell4 : -60 : 160  
 zerofill : 1  
 rb : 1 : TRUE : TRUE  
 ppm  
 [transpose]  
 sinbell4 : -60 : 160  
 zerofill : 2  
 rb : 1 : TRUE : TRUE  
 ppm  
 [transpose]

Filename = 2,3-Dimethyl-6-chloroquinoxaline  
 Author = Chivestav  
 Experiment = hmqc\_pfg\_ex2  
 Sample\_id = 136  
 Solvent = CHLOROFORM-D  
 Creation\_time = 22-MAR-2014 10:32:48  
 Revision\_time = 24-MAR-2014 11:32:13  
 Current\_time = 24-MAR-2014 11:34:21

Comment = gradient enhanced HMQ  
 Data\_format = 1D\_REAL  
 Dim\_size = 1888  
 Dim\_site = 15N  
 Dim\_units = [ppm]  
 Dimensions = Y  
 Site = ECA 500  
 Spectrometer = DELTA2\_NMR  
 Field\_strength = 11.74735787 [500]MH  
 X\_acq\_duration = 0.53673984[s]  
 X\_domain = 1H  
 X\_freq = 500.15991521[MHz]  
 X\_offset = 5.31241[ppm]  
 X\_points = 2048  
 X\_ptscans = 4  
 X\_resolution = 1.68310001[Hz]  
 X\_sweep = 3.81562882[kHz]  
 Y\_domain = 15N  
 Y\_freq = 50.70062572[MHz]  
 Y\_offset = -55.91547[ppm]  
 Y\_points = 944  
 Y\_ptscans = 8  
 Y\_resolution = 1.63667578[Hz]  
 Y\_sweep = 1.54502194[kHz]  
 Tr\_domain = 1H  
 Tr\_freq = 500.15991521[MHz]  
 Tr\_offset = 5.0[ppm]  
 Clipped = FALSE  
 Mod\_return = 1  
 Scans = 8  
 Total\_scans = 7552

X\_acq\_time = 0.53673984[s]  
 X\_atn = 6[dB]  
 X\_pulse = 12.79[us]  
 Y\_acq\_time = 0.66277376[s]  
 Y\_atn = 9[dB]  
 Y\_pulse = 21.6[us]  
 Ir\_atn\_dec = 22.3[dB]  
 Ir\_noise = MPPF  
 Tr\_noise = Gf  
 Date\_presat = FALSE  
 Decoupling = TRUE  
 Grad\_1 = 1[Hz]  
 Grad\_1\_amp = 0.18[T/m]

## 2,3-Dimethyl-6-bromoquinoxaline (7).

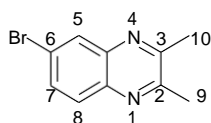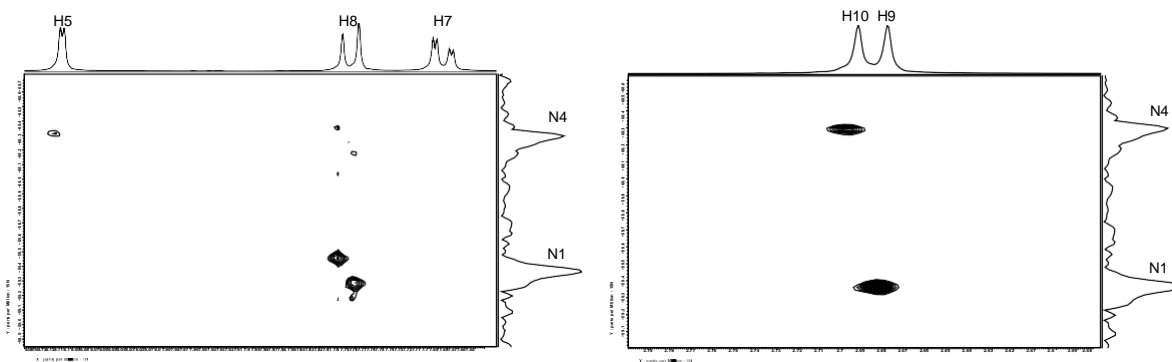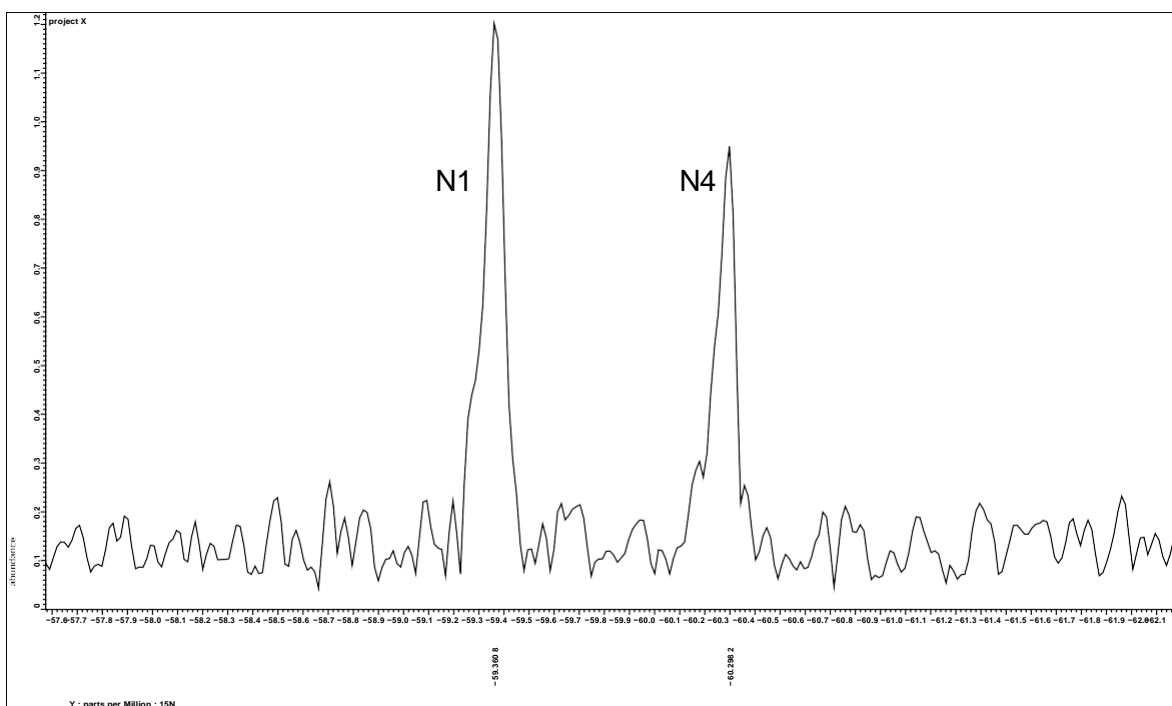



## 2,3-Dimethylquinoxaline-6-carboxylic acid (8).

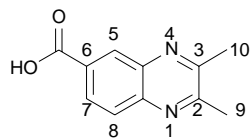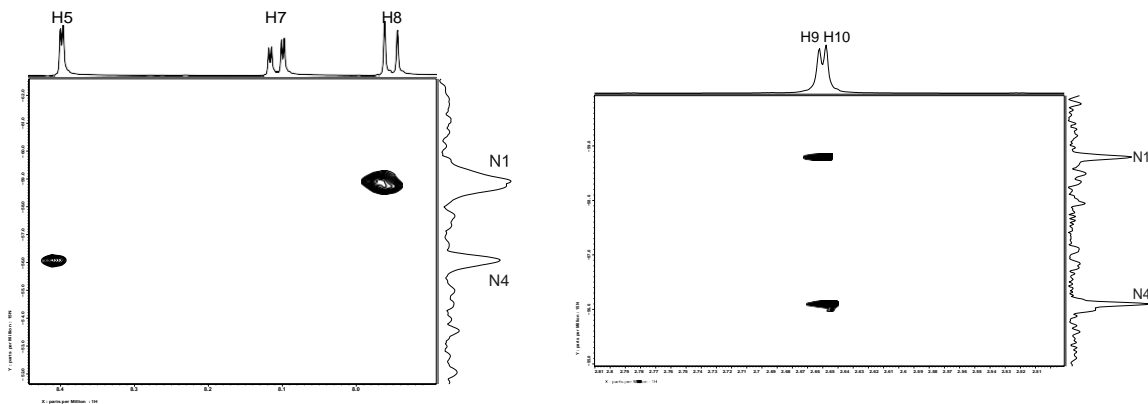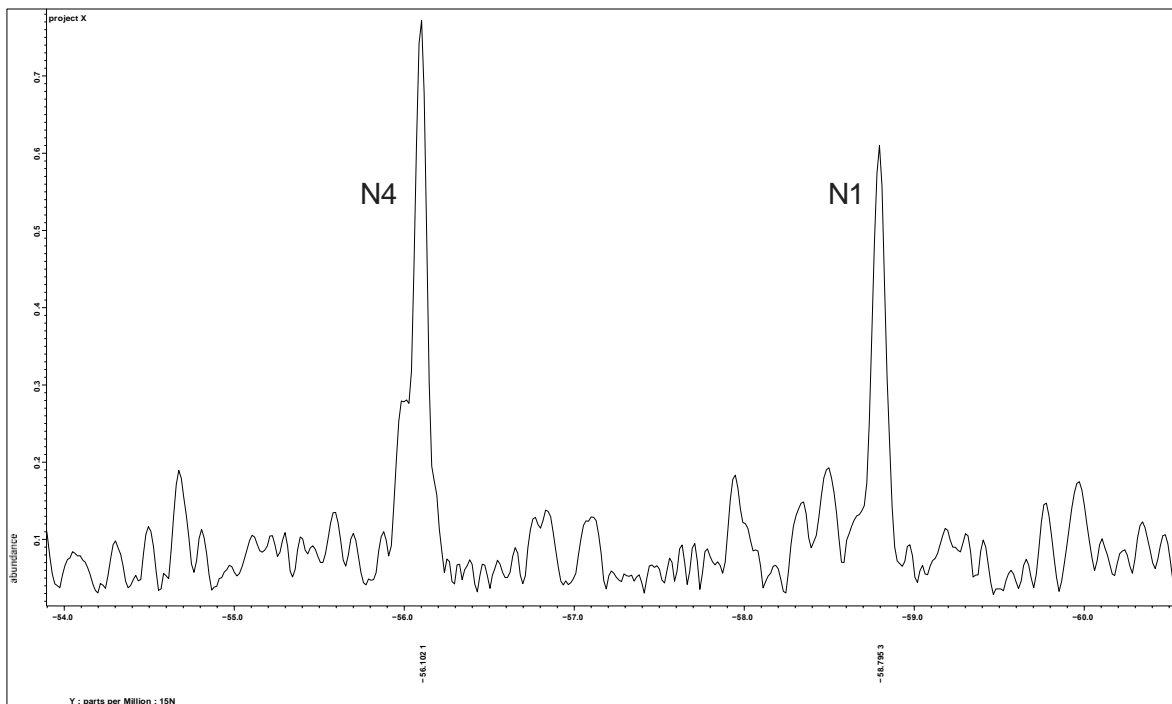

# Methyl 2,3-dimethylquinoxaline-6-carboxylate (9).

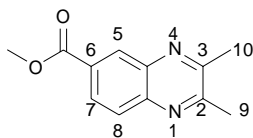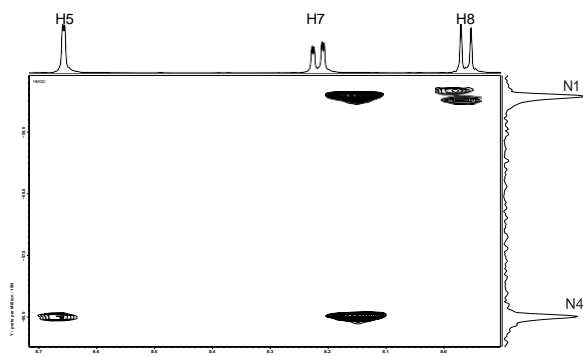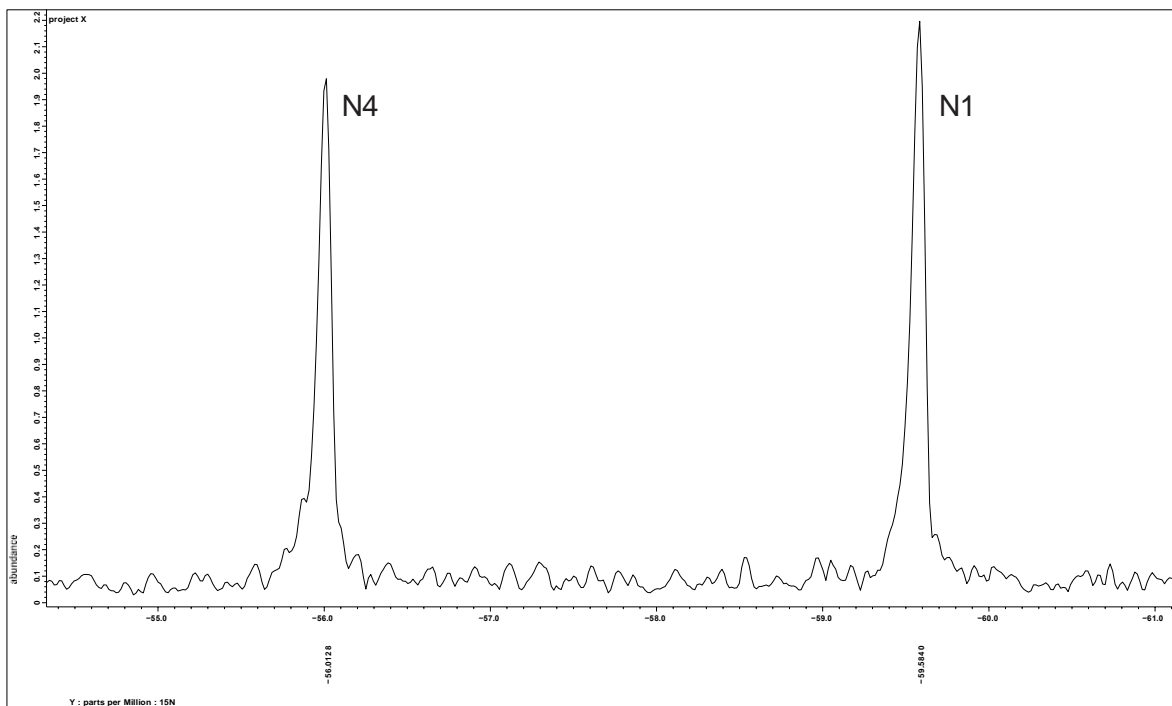

(2,3-dimethyl-6-quinoxaliny)phenyl-methanone (10).

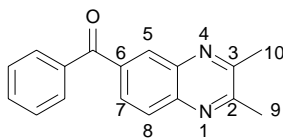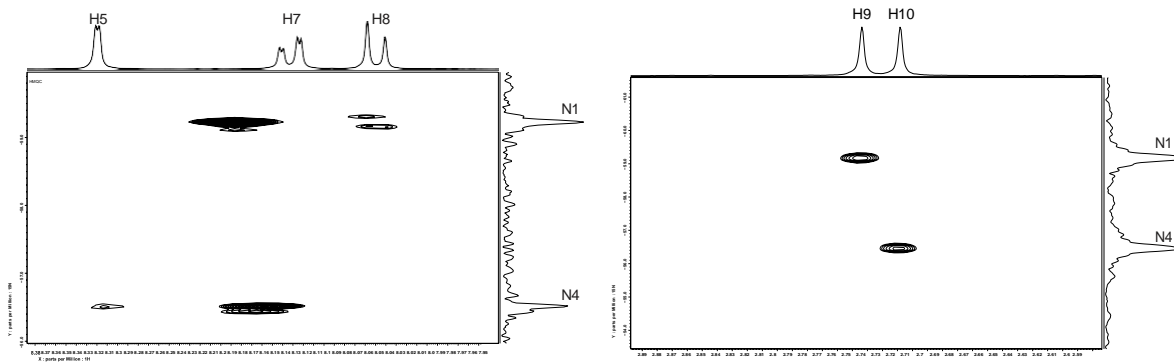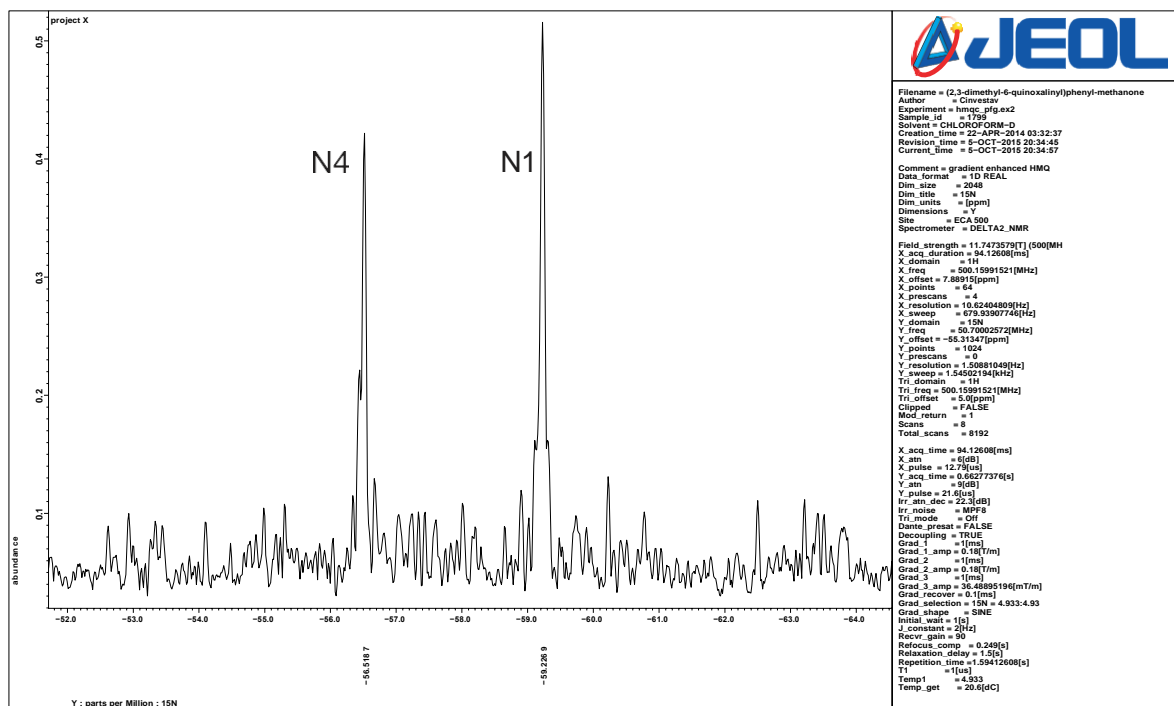

## 2,2',3,3'-Tetramethyl-6,6'-biquinoxaline (11).

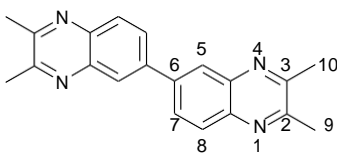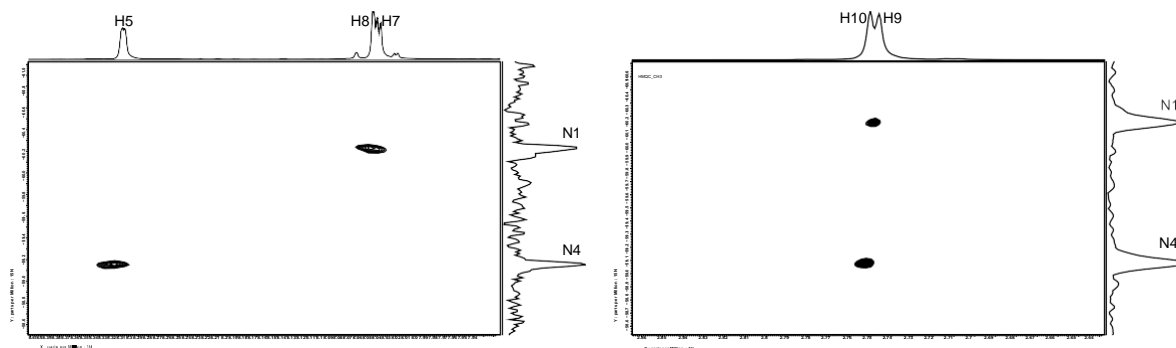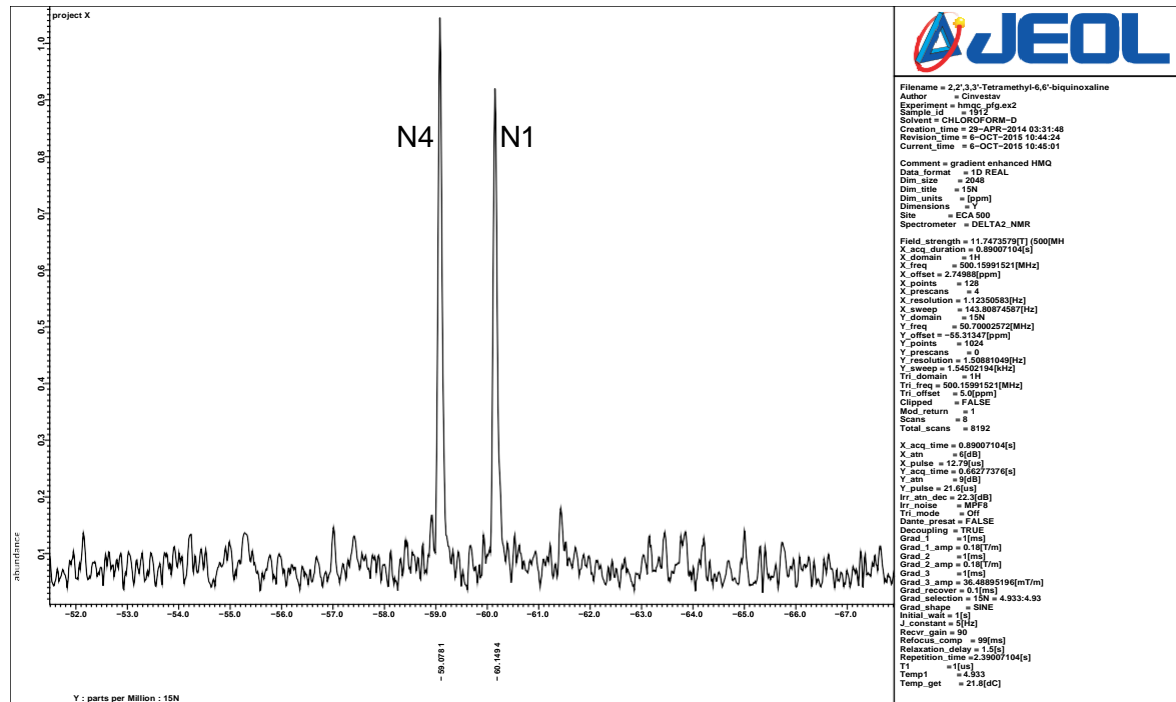

### III. Spectrometric NMR titration

To evaluate the reactivity of compounds and in order to get a better accuracy and a smoother curve titration, is necessary considering the decimals values of the chemical shifts of H9 and H10. Subsequently the *pKa* values are getting with the semilogarithmic Henderson-Hasselbalch equation and the  $\Delta K$  is obtained using the  $\delta$ -diagram and the Perrin linearization. The data of 2,3-dimethyl-6R-quinoxalines are showed as follows:

#### 2,3-Dimethylquinoxaline (1).

| pH   | $\delta$ H9 | $\delta$ H10 | pH   | $\delta$ H9 | $\delta$ H10 |
|------|-------------|--------------|------|-------------|--------------|
| 7.54 | 2.5943      | 2.5943       | 0.94 | 2.6748      | 2.6748       |
| 1.82 | 2.6042      | 2.6042       | 0.91 | 2.6847      | 2.6847       |
| 1.53 | 2.6148      | 2.6148       | 0.91 | 2.6974      | 2.6974       |
| 1.4  | 2.6254      | 2.6254       | 0.74 | 2.708       | 2.708        |
| 1.25 | 2.6381      | 2.6381       | 0.66 | 2.7221      | 2.7221       |
| 1.06 | 2.6501      | 2.6501       | 0.63 | 2.7334      | 2.7334       |
| 1.12 | 2.6621      | 2.6621       | 0.57 | 2.7454      | 2.7454       |

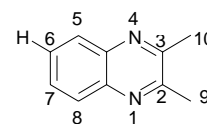

#### 2,3-Dimethyl-6-nitroquinoxaline (2).

| pH   | $\delta$ H9 | $\delta$ H10 | pH   | $\delta$ H9 | $\delta$ H10 |
|------|-------------|--------------|------|-------------|--------------|
| 6.45 | 2.6557      | 2.6557       | 0.75 | 2.66068     | 2.65644      |
| 0.32 | 2.66279     | 2.65993      | 0.65 | 2.65997     | 2.6550       |
| 0.49 | 2.6642      | 2.66139      | 0.79 | 2.6586      | 2.65357      |
| 0.53 | 2.66419     | 2.66066      | 0.64 | 2.65856     | 2.65288      |
| 0.45 | 2.66377     | 2.66023      |      |             |              |
| 0.57 | 2.66212     | 2.65821      |      |             |              |
| 0.7  | 2.66139     | 2.65715      |      |             |              |

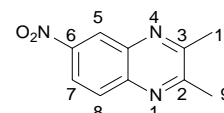

#### 2,3-Dimethyl-6-chloroquinoxaline (6).

| pH   | $\delta$ H9 | $\delta$ H10 | pH   | $\delta$ H9 | $\delta$ H10 |
|------|-------------|--------------|------|-------------|--------------|
| 6.63 | 2.5512      | 2.5554       | 0.73 | 2.6077      | 2.6112       |
| 1.36 | 2.5547      | 2.5590       | 0.7  | 2.6119      | 2.6155       |
| 0.94 | 2.5689      | 2.5731       | 0.73 | 2.6162      | 2.6197       |
| 0.77 | 2.5809      | 2.5851       | 0.68 | 2.6197      | 2.6225       |
| 0.74 | 2.5900      | 2.5936       | 0.71 | 2.6232      | 2.6261       |
| 0.72 | 2.5971      | 2.6013       | 0.7  | 2.6275      | 2.6296       |
| 0.67 | 2.6028      | 2.6063       | 0.72 | 2.6310      | 2.6331       |

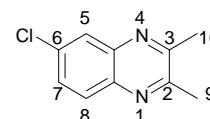

**2,3-Dimethyl-6-bromoquinoxaline (7).**

| pH   | $\delta\text{H9}$ | $\delta\text{H10}$ | pH   | $\delta\text{H9}$ | $\delta\text{H10}$ |
|------|-------------------|--------------------|------|-------------------|--------------------|
| 6.08 | 2.5484            | 2.5625             | 0.7  | 2.6105            | 2.6239             |
| 0.92 | 2.5625            | 2.5759             | 0.68 | 2.6148            | 2.6282             |
| 0.71 | 2.5759            | 2.5900             | 0.75 | 2.6176            | 2.6310             |
| 0.76 | 2.5865            | 2.5999             | 0.65 | 2.6211            | 2.6338             |
| 0.69 | 2.5950            | 2.6084             | 0.69 | 2.6239            | 2.6374             |
| 0.66 | 2.6013            | 2.6148             | 0.68 | 2.6254            | 2.6388             |
| 0.66 | 2.6063            | 2.6197             |      |                   |                    |

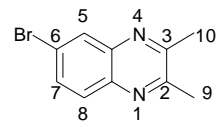

**2,3-Dimethylquinoxaline-6-carboxylic acid (8).**

| pH   | $\delta\text{H9}$ | $\delta\text{H10}$ | pH | $\delta\text{H9}$ | $\delta\text{H10}$ |
|------|-------------------|--------------------|----|-------------------|--------------------|
| 5.25 | 2.6352            | 2.6324             | 0  | 2.7362            | 2.7306             |
| 3.27 | 2.6360            | 2.6331             | 0  | 2.7426            | 2.7362             |
| 0.53 | 2.6550            | 2.6522             | 0  | 2.7496            | 2.7433             |
| 0.19 | 2.6819            | 2.6776             |    |                   |                    |
| 0.12 | 2.7002            | 2.6960             |    |                   |                    |
| 0.1  | 2.7143            | 2.7094             |    |                   |                    |
| 0    | 2.7263            | 2.7207             |    |                   |                    |

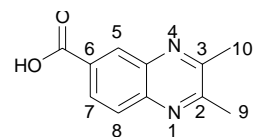

**Methyl 2,3-dimethylquinoxaline-6-carboxylate (9).**

| pH   | $\delta\text{H9}$ | $\delta\text{H10}$ | pH   | $\delta\text{H9}$ | $\delta\text{H10}$ |
|------|-------------------|--------------------|------|-------------------|--------------------|
| 8.43 | 2.5943            | 2.5900             | 0.67 | 2.6480            | 2.6423             |
| 1.4  | 2.6003            | 2.5954             | 0.66 | 2.6557            | 2.6501             |
| 1.12 | 2.6084            | 2.6042             | 0.61 | 2.6649            | 2.6586             |
| 1    | 2.6169            | 2.6119             | 0.58 | 2.6748            | 2.6684             |
| 0.84 | 2.6247            | 2.6197             |      |                   |                    |
| 0.8  | 2.6324            | 2.6275             |      |                   |                    |
| 0.74 | 2.6395            | 2.6345             |      |                   |                    |

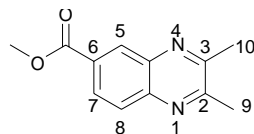

**(2,3-dimethyl-6-quinoxaliny)phenyl-methanone (10).**

| pH   | $\delta^{\text{H9}}$ | $\delta^{\text{H10}}$ | pH   | $\delta^{\text{H9}}$ | $\delta^{\text{H10}}$ |
|------|----------------------|-----------------------|------|----------------------|-----------------------|
| 8.07 | 2.6480               | 2.6225                | 0.45 | 2.7306               | 2.7037                |
| 1.66 | 2.6515               | 2.6261                | 0.41 | 2.7419               | 2.7150                |
| 1    | 2.6649               | 2.6395                | 0.4  | 2.7525               | 2.7249                |
| 0.85 | 2.6797               | 2.6543                | 0.33 | 2.7595               | 2.7320                |
| 0.72 | 2.6939               | 2.6677                | 0.34 | 2.7673               | 2.7391                |
| 0.58 | 2.7059               | 2.6797                | 0.35 | 2.7779               | 2.7489                |
| 0.51 | 2.7200               | 2.6932                |      |                      |                       |

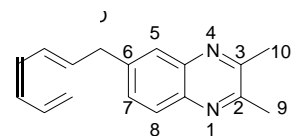

**2,2',3,3'-Tetramethyl-6,6'-biquinoxaline (11).**

| pH   | $\delta^{\text{H9}}$ | $\delta^{\text{H10}}$ | pH   | $\delta^{\text{H9}}$ | $\delta^{\text{H10}}$ |
|------|----------------------|-----------------------|------|----------------------|-----------------------|
| 7.11 | 2.6522               | 2.6564                | 0.09 | 2.8111               | 2.8196                |
| 4.07 | 2.6833               | 2.6889                | 0.11 | 2.8196               | 2.8280                |
| 2.21 | 2.7256               | 2.7334                |      |                      |                       |
| 0.26 | 2.7602               | 2.768                 |      |                      |                       |
| 0.17 | 2.7779               | 2.7857                |      |                      |                       |
| 0.09 | 2.7927               | 2.8005                |      |                      |                       |
| 0.00 | 2.8019               | 2.8097                |      |                      |                       |

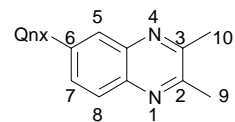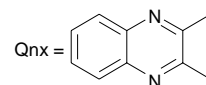

## IV. Computational chemistry

The structures **1-14** were optimized with DFT  $\omega$ B97XD/6-311++G (d,p) level of theory, the HOMO orbitals were get from optimized structures with HF 6-311++G (d,p) basis set. The bond lengths and angles are accord to X-ray data reported in literature. Tables **1S** and **2S** showed the values obtained for compounds **1-14**.

**Table 1S.** Bond length (Å) of 2,3-dimethyl-6R-quinoxalines optimized with DFT  $\omega$ B97XD/6-311++(d,p) level theory.

| Comp                  | C2C3  | C2C9  | C3C10 | C6C7  | C6R <sup>a</sup> | C7C8  | C8C8a | C9C10 | N1C2  | N1C8a |
|-----------------------|-------|-------|-------|-------|------------------|-------|-------|-------|-------|-------|
| <b>1</b>              | 1.442 | 1.501 | 1.501 | 1.413 | 1.084            | 1.369 | 1.413 | 2.964 | 1.305 | 1.362 |
| <b>1<sup>b</sup></b>  | 1.443 | 1.492 | 1.492 | 1.404 |                  | 1.348 | 1.405 | 2.974 | 1.310 | 1.368 |
| <b>2</b>              | 1.446 | 1.499 | 1.500 | 1.408 | 1.477            | 1.367 | 1.413 | 2.963 | 1.304 | 1.362 |
| <b>2<sup>c</sup></b>  | 1.447 | 1.496 | 1.494 | 1.401 | 1.466            | 1.372 | 1.409 | 2.942 | 1.311 | 1.371 |
| <b>3</b>              | 1.445 | 1.500 | 1.500 | 1.419 | 1.434            | 1.367 | 1.413 | 2.964 | 1.304 | 1.362 |
| <b>4</b>              | 1.443 | 1.500 | 1.500 | 1.416 | 1.503            | 1.366 | 1.414 | 2.963 | 1.305 | 1.361 |
| <b>5</b>              | 1.441 | 1.501 | 1.501 | 1.406 | 1.344            | 1.368 | 1.413 | 2.964 | 1.305 | 1.361 |
| <b>6</b>              | 1.442 | 1.500 | 1.500 | 1.411 | 1.746            | 1.368 | 1.413 | 2.963 | 1.305 | 1.361 |
| <b>7</b>              | 1.443 | 1.500 | 1.500 | 1.412 | 1.899            | 1.368 | 1.412 | 2.963 | 1.305 | 1.361 |
| <b>8</b>              | 1.445 | 1.500 | 1.500 | 1.417 | 1.488            | 1.368 | 1.413 | 2.963 | 1.304 | 1.362 |
| <b>9</b>              | 1.444 | 1.500 | 1.500 | 1.417 | 1.491            | 1.368 | 1.413 | 2.963 | 1.305 | 1.362 |
| <b>10</b>             | 1.443 | 1.500 | 1.500 | 1.419 | 1.498            | 1.366 | 1.414 | 2.964 | 1.305 | 1.361 |
| <b>11</b>             | 1.440 | 1.503 | 1.505 | 1.421 | 1.483            | 1.367 | 1.413 | 3.025 | 1.307 | 1.358 |
| <b>11<sup>d</sup></b> | 1.442 | 1.500 | 1.497 | 1.418 | 1.489            | 1.373 | 1.409 | 2.950 | 1.315 | 1.378 |
| <b>12</b>             | 1.443 | 1.501 | 1.501 | 1.416 | 1.355            | 1.371 | 1.408 | 2.962 | 1.304 | 1.361 |
| <b>13</b>             | 1.441 | 1.501 | 1.501 | 1.416 | 1.358            | 1.368 | 1.412 | 2.963 | 1.305 | 1.360 |
| <b>14</b>             | 1.437 | 1.502 | 1.501 | 1.424 | 1.374            | 1.364 | 1.414 | 2.963 | 1.307 | 1.356 |

<sup>a</sup> Distance of carbon atom with substituent R. <sup>b</sup> X-ray of compound **1** is report in Reference 3, <sup>c</sup> compound **2** in reference 4 and <sup>d</sup> compound **11** in reference 5.

**Table 2S.** Angles ( $^{\circ}$ ,  $\angle_{\text{NCC}}$ ) of 2,3-dimethyl-6R-quinoxalines optimized with DFT  $\omega$ B97XD/6-311++(d,p) level theory.

|                       | $\angle_{\text{N129}}$ | $\angle_{\text{N123}}$ | $\angle_{\text{N18a8}}$ | $\angle_{\text{N18a4a}}$ | $\angle_{\text{N432}}$ | $\angle_{\text{2N18a}}$ | $\angle_{\text{2310}}$ | $\angle_{\text{329}}$ | $\angle_{\text{8a87}}$ | $\angle_{\text{678}}$ | $\angle_{\text{567}}$ |
|-----------------------|------------------------|------------------------|-------------------------|--------------------------|------------------------|-------------------------|------------------------|-----------------------|------------------------|-----------------------|-----------------------|
| <b>1</b>              | 118.0                  | 121.4                  | 119.6                   | 120.7                    | 121.4                  | 117.7                   | 120.4                  | 120.4                 | 119.8                  | 120.5                 | 120.5                 |
| <b>1<sup>b</sup></b>  | 117.7                  | 121.5                  | 119.8                   | 120.8                    |                        | 117.7                   |                        | 120.9                 | 119.9                  | 120.8                 |                       |
| <b>2</b>              | 118.0                  | 121.6                  | 119.4                   | 120.7                    | 121.4                  | 117.6                   | 120.4                  | 120.3                 | 120.2                  | 118.8                 | 122.9                 |
| <b>2<sup>c</sup></b>  | 118.2                  | 121.8                  | 119.1                   | 121.0                    | 121.7                  | 117.1                   | 120.1                  | 119.9                 | 120.1                  | 118.7                 | 123.6                 |
| <b>3</b>              | 118.0                  | 121.5                  | 119.5                   | 120.7                    | 121.4                  | 117.6                   | 120.4                  | 120.3                 | 120.1                  | 120.0                 | 120.8                 |
| <b>4</b>              | 118.0                  | 121.5                  | 119.6                   | 120.7                    | 121.4                  | 117.6                   | 120.4                  | 120.3                 | 120.0                  | 120.1                 | 121.0                 |
| <b>5</b>              | 118.1                  | 121.3                  | 119.5                   | 120.8                    | 121.6                  | 117.7                   | 120.4                  | 120.5                 | 120.1                  | 119.0                 | 123.0                 |
| <b>6</b>              | 118.0                  | 121.4                  | 119.7                   | 120.8                    | 121.5                  | 117.6                   | 120.3                  | 120.4                 | 120.2                  | 119.6                 | 121.8                 |
| <b>7</b>              | 118.1                  | 121.4                  | 119.7                   | 120.8                    | 121.5                  | 117.6                   | 120.4                  | 120.4                 | 120.3                  | 119.6                 | 121.7                 |
| <b>8</b>              | 118.0                  | 121.6                  | 119.6                   | 120.7                    | 121.4                  | 117.6                   | 120.4                  | 120.3                 | 120.0                  | 120.3                 | 120.5                 |
| <b>9</b>              | 118.0                  | 121.6                  | 119.6                   | 120.7                    | 121.4                  | 117.6                   | 120.4                  | 120.3                 | 120.0                  | 120.3                 | 120.4                 |
| <b>10</b>             | 118.0                  | 121.5                  | 119.7                   | 120.7                    | 121.4                  | 117.6                   | 120.4                  | 120.4                 | 119.9                  | 120.7                 | 119.9                 |
| <b>11</b>             | 117.2                  | 121.2                  | 119.9                   | 120.8                    | 121.3                  | 117.9                   | 122.0                  | 121.4                 | 119.9                  | 121.3                 | 119.1                 |
| <b>11<sup>d</sup></b> | 118.6                  | 121.7                  | 119.9                   | 120.8                    | 121.8                  | 117.1                   | 120.7                  | 119.6                 | 120.0                  | 121.1                 | 119.0                 |
| <b>12</b>             | 118.1                  | 121.3                  | 119.8                   | 121.1                    | 121.8                  | 117.6                   | 120.2                  | 120.5                 | 120.6                  | 120.1                 | 120.2                 |
| <b>13</b>             | 118.1                  | 121.2                  | 119.7                   | 121.1                    | 121.7                  | 117.6                   | 120.3                  | 120.6                 | 120.1                  | 120.4                 | 120.6                 |
| <b>14</b>             | 118.1                  | 121.1                  | 120.0                   | 121.2                    | 121.8                  | 117.7                   | 120.3                  | 120.7                 | 120.4                  | 121.0                 | 119.1                 |

See footnote in table S1 for <sup>b</sup>, <sup>c</sup> and <sup>d</sup>



To calculate the heat formation of compounds was used the Spartan Pro 08 software<sup>6</sup> and Gaussian 09 package.<sup>7</sup> The initial and ending regioisomers **a:b**, mesomeric forms (**a1-a4, b1-b4**) and intermediaries (**a5-a6, b5-b6**) of complexes (2,3-dimethyl-6R-quinoxalines)- SeO<sub>2</sub> were built in Spartan pro 08 as shown in scheme 3, previously were optimized with molecular mechanics (MMFF94), the structures were exported to Gaussian 09 as MDL files, subsequently were calculated the heat formation energies with semiempirical PM6 method. The energy data obtained and the energetic diagrams were processed and built in a Microsoft excel worksheet respectively. Details of calculations for structures are shown as follows:

## 2,3-Dimethylquinoxaline (1).

---

|                     |                    |
|---------------------|--------------------|
| Calculation Type    | OPT + FREQ         |
| Calculation Method  | R $\omega$ B97XD   |
| Basis Set           | 6-311++G(d,p)      |
| Charge              | 0                  |
| Spin                | Singlet            |
| E(R $\omega$ B97XD) | -496.55382297 a.u. |
| RMS Gradient Norm   | 0.00000451 a.u.    |
| Imaginary Freq      | 0                  |
| Dipole Moment       | 0.8639 Debye       |
| Point Group         | C1                 |

---

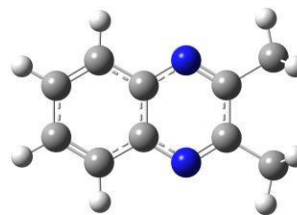

Standard orientation:

---

| Center<br>Number | Atomic<br>Number | Atomic<br>Type | Coordinates (Angstroms) |           |           |
|------------------|------------------|----------------|-------------------------|-----------|-----------|
|                  |                  |                | X                       | Y         | Z         |
| 1                | 6                | 0              | -3.092271               | 0.706911  | 0.000009  |
| 2                | 6                | 0              | -1.912657               | 1.403510  | -0.000025 |
| 3                | 6                | 0              | -0.683403               | 0.705931  | -0.000016 |
| 4                | 6                | 0              | -0.683402               | -0.705931 | -0.000007 |
| 5                | 6                | 0              | -1.912656               | -1.403510 | 0.000015  |
| 6                | 6                | 0              | -3.092271               | -0.706911 | 0.000036  |
| 7                | 1                | 0              | -4.036534               | 1.239577  | 0.000019  |
| 8                | 1                | 0              | -1.884877               | 2.486969  | -0.000043 |
| 9                | 1                | 0              | -1.884875               | -2.486969 | 0.000030  |
| 10               | 6                | 0              | 1.600115                | -0.721237 | -0.000049 |
| 11               | 6                | 0              | 1.600113                | 0.721237  | -0.000028 |
| 12               | 6                | 0              | 2.894180                | -1.482040 | -0.000009 |
| 13               | 1                | 0              | 3.496066                | -1.235494 | -0.880003 |
| 14               | 1                | 0              | 3.495127                | -1.236783 | 0.881024  |
| 15               | 1                | 0              | 2.684711                | -2.550634 | -0.000802 |
| 16               | 6                | 0              | 2.894179                | 1.482041  | 0.000050  |
| 17               | 1                | 0              | 3.495642                | 1.235879  | 0.880457  |
| 18               | 1                | 0              | 3.495547                | 1.236399  | -0.880569 |
| 19               | 1                | 0              | 2.684714                | 2.550636  | 0.000333  |
| 20               | 7                | 0              | 0.487103                | -1.403194 | -0.000037 |
| 21               | 7                | 0              | 0.487102                | 1.403193  | -0.000016 |
| 22               | 1                | 0              | -4.036533               | -1.239578 | 0.000069  |

---

---

|                    |      |
|--------------------|------|
| Calculation Type   | SP   |
| Calculation Method | RPM6 |
| Basis Set          | ZDO  |

---

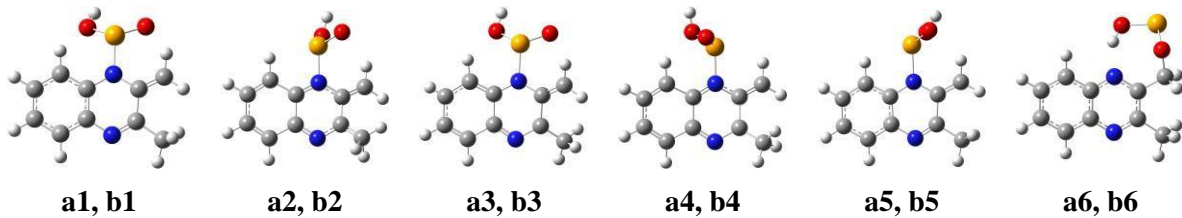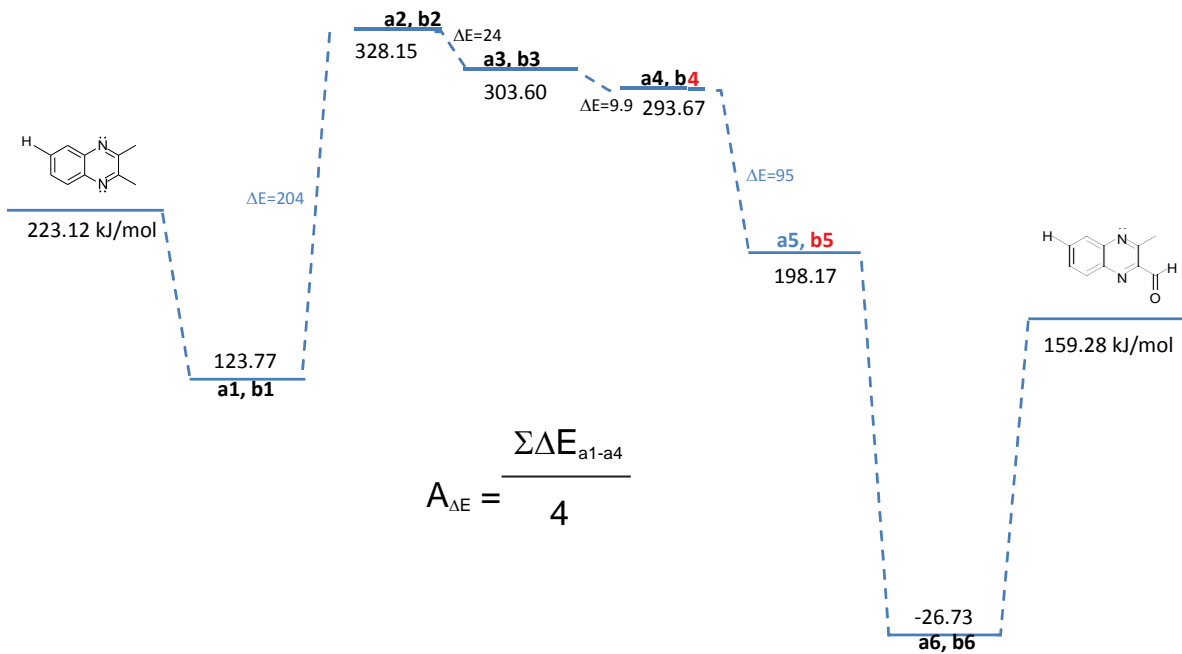

## 2,3-Dimethyl-6-nitroquinoxaline (2).

Calculation Type OPT + FREQ  
Calculation Method R $\omega$ B97XD  
Basis Set 6-311++G(d,p)  
Charge 0  
Spin Singlet  
E(R $\omega$ B97XD) -701.04864973 a.u.  
RMS Gradient Norm 0.00013478 a.u.  
Imaginary Freq 0  
Dipole Moment 6.2709 Debye  
Point Group CS

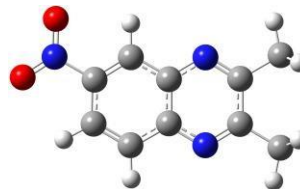

Standard orientation:

| Center Number | Atomic Number | Atomic Type | Coordinates (Angstroms) |           |           |
|---------------|---------------|-------------|-------------------------|-----------|-----------|
|               |               |             | X                       | Y         | Z -----   |
| 1             | 6             | 0           | -1.844497               | -1.038294 | 0.000000  |
| 2             | 1             | 0           | -2.076010               | 1.090417  | 0.000000  |
| 3             | 6             | 0           | -1.392099               | 0.252295  | 0.000000  |
| 4             | 6             | 0           | 0.368416                | -1.942075 | 0.000000  |
| 5             | 6             | 0           | 0.000000                | 0.473768  | 0.000000  |
| 6             | 6             | 0           | -0.983285               | -2.152372 | 0.000000  |
| 7             | 6             | 0           | 0.883894                | -0.626031 | 0.000000  |
| 8             | 7             | 0           | 0.469309                | 1.753348  | 0.000000  |
| 9             | 1             | 0           | -1.405770               | -3.147550 | 0.000000  |
| 10            | 1             | 0           | 1.070588                | -2.766851 | 0.000000  |
| 11            | 6             | 0           | 1.762090                | 1.921472  | 0.000000  |
| 12            | 6             | 0           | 2.669300                | 0.795033  | 0.000000  |
| 13            | 7             | 0           | 2.232830                | -0.434436 | 0.000000  |
| 14            | 7             | 0           | -3.302464               | -1.275749 | 0.000000  |
| 15            | 8             | 0           | -4.033923               | -0.306735 | 0.000000  |
| 16            | 8             | 0           | -3.681140               | -2.430451 | 0.000000  |
| 17            | 6             | 0           | 4.152595                | 1.016682  | 0.000000  |
| 18            | 1             | 0           | 4.463331                | 1.586711  | 0.880514  |
| 19            | 1             | 0           | 4.463331                | 1.586711  | -0.880514 |
| 20            | 1             | 0           | 4.661219                | 0.054159  | 0.000000  |
| 21            | 6             | 0           | 2.292806                | 3.324489  | 0.000000  |
| 22            | 1             | 0           | 2.915372                | 3.508079  | 0.880569  |
| 23            | 1             | 0           | 2.915372                | 3.508079  | -0.880569 |
| 24            | 1             | 0           | 1.460031                | 4.025784  | 0.000000  |

Calculation Type SP  
Calculation Method RPM6  
Basis Set ZDO

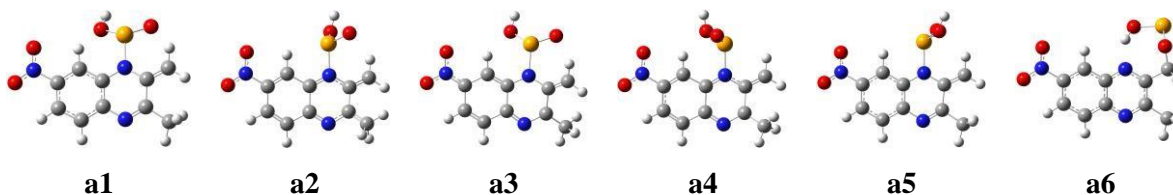

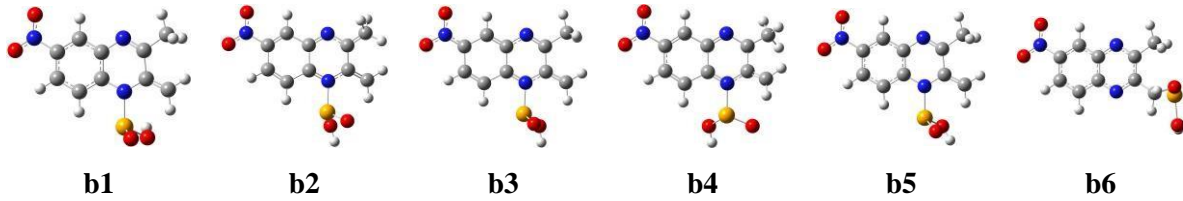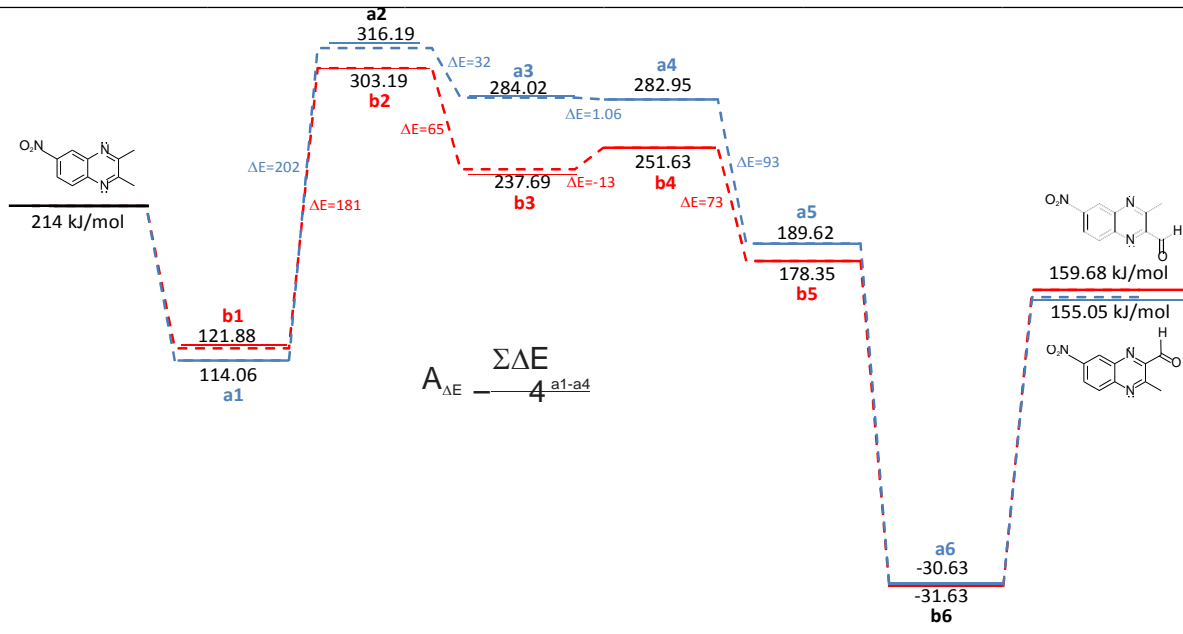

### 6-carbonitrile-2,3-dimethylquinoxaline (3).

|                     |                    |
|---------------------|--------------------|
| Calculation Type    | OPT + FREQ         |
| Calculation Method  | R $\omega$ B97XD   |
| Basis Set           | 6-311++G(d,p)      |
| Charge              | 0                  |
| Spin                | Singlet            |
| E(R $\omega$ B97XD) | -588.78280682 a.u. |
| RMS Gradient Norm   | 0.00006290 a.u.    |
| Imaginary Freq      | 0                  |
| Dipole Moment       | 6.0776 Debye       |
| Point Group         | CS                 |

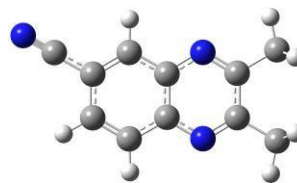

Standard orientation:

| Center Number | Atomic Number | Atomic Type | Coordinates (Angstroms) |           |           |
|---------------|---------------|-------------|-------------------------|-----------|-----------|
|               |               |             | X                       | Y         | Z         |
| 1             | 6             | 0           | -2.386994               | 0.798571  | 0.000000  |
| 2             | 1             | 0           | -0.964926               | 2.414465  | 0.000000  |
| 3             | 6             | 0           | -1.122938               | 1.342965  | 0.000000  |
| 4             | 6             | 0           | -1.491448               | -1.443203 | 0.000000  |
| 5             | 6             | 0           | 0.000000                | 0.490299  | 0.000000  |
| 6             | 6             | 0           | -2.574013               | -0.608422 | 0.000000  |
| 7             | 6             | 0           | -0.183051               | -0.908009 | 0.000000  |
| 8             | 7             | 0           | 1.249183                | 1.034944  | 0.000000  |
| 9             | 1             | 0           | -3.580831               | -1.007685 | 0.000000  |
| 10            | 1             | 0           | -1.605648               | -2.520453 | 0.000000  |
| 11            | 6             | 0           | 2.264747                | 0.216581  | 0.000000  |
| 12            | 6             | 0           | 2.078051                | -1.216955 | 0.000000  |
| 13            | 7             | 0           | 0.887229                | -1.750686 | 0.000000  |
| 14            | 6             | 0           | 3.263691                | -2.135857 | 0.000000  |
| 15            | 1             | 0           | 3.890421                | -1.966324 | 0.880465  |
| 16            | 1             | 0           | 3.890421                | -1.966324 | -0.880465 |
| 17            | 1             | 0           | 2.920089                | -3.168976 | 0.000000  |
| 18            | 6             | 0           | 3.645279                | 0.803728  | 0.000000  |
| 19            | 1             | 0           | 4.208889                | 0.481711  | 0.880615  |
| 20            | 1             | 0           | 4.208889                | 0.481711  | -0.880615 |
| 21            | 1             | 0           | 3.574399                | 1.890151  | 0.000000  |
| 22            | 6             | 0           | -3.535444               | 1.658504  | 0.000000  |
| 23            | 7             | 0           | -4.463409               | 2.340386  | 0.000000  |

|                    |      |
|--------------------|------|
| Calculation Type   | SP   |
| Calculation Method | RPM6 |
| Basis Set          | ZDO  |

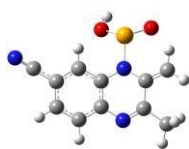

a1

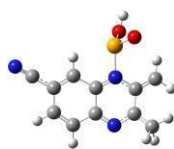

a2

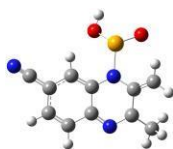

a3

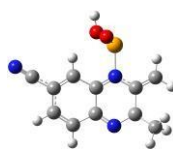

a4

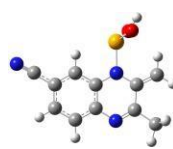

a5

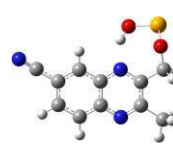

a6

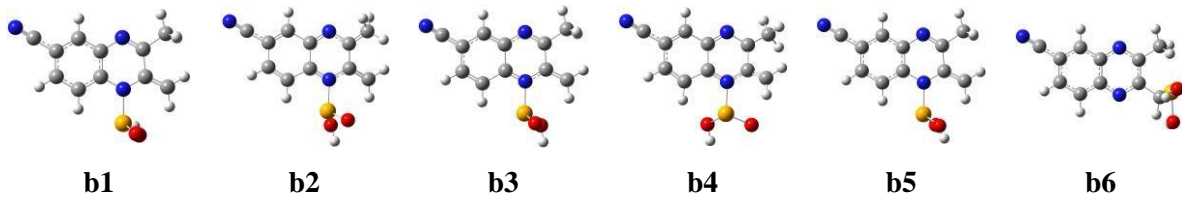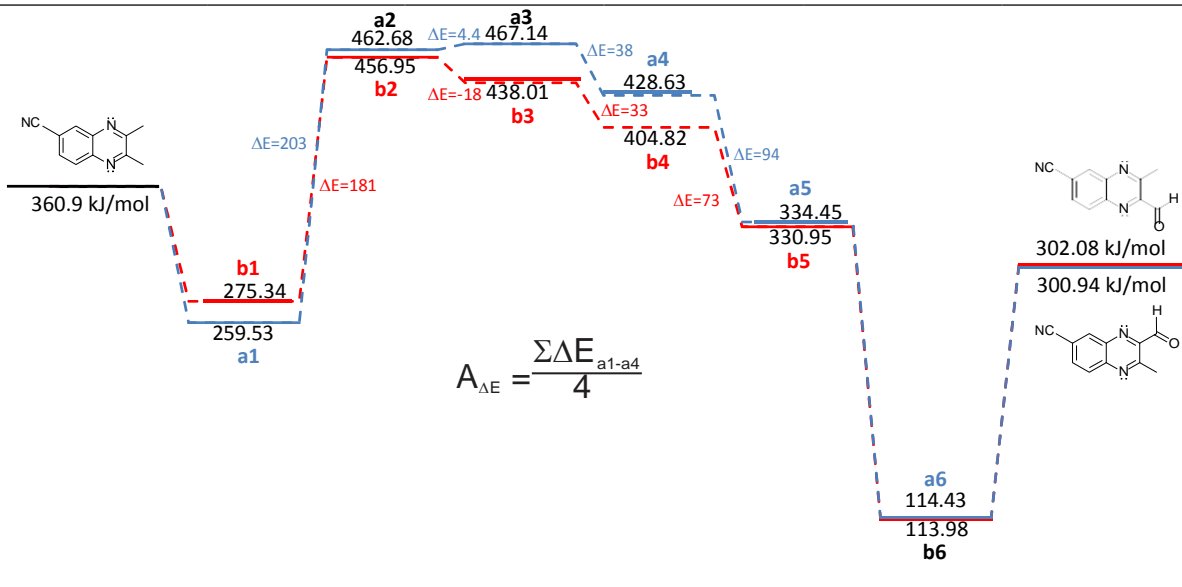

## 2,3-Dimethyl-6-(trifluoromethyl)quinoxaline (4).

---

|                     |                    |
|---------------------|--------------------|
| Calculation Type    | OPT + FREQ         |
| Calculation Method  | R $\omega$ B97XD   |
| Basis Set           | 6-311++G(d,p)      |
| Charge              | 0                  |
| Spin                | Singlet            |
| E(R $\omega$ B97XD) | -833.61280178 a.u. |
| RMS Gradient Norm   | 0.00001019 a.u.    |
| Imaginary Freq      | 0                  |
| Dipole Moment       | 4.2572 Debye       |
| Point Group         | C1                 |

---

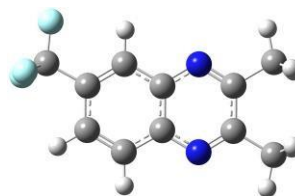

Standard orientation:

---

| Center Number | Atomic Number | Atomic Type | Coordinates (Angstroms) |           |           |
|---------------|---------------|-------------|-------------------------|-----------|-----------|
|               |               |             | X                       | Y         | Z         |
| 1             | 6             | 0           | 1.775458                | 0.128790  | -0.009440 |
| 2             | 1             | 0           | 0.990238                | -1.871244 | -0.016130 |
| 3             | 6             | 0           | 0.779780                | -0.809416 | -0.011891 |
| 4             | 6             | 0           | 0.175668                | 1.933366  | -0.001247 |
| 5             | 6             | 0           | -0.569813               | -0.390017 | -0.008599 |
| 6             | 6             | 0           | 1.475923                | 1.512814  | -0.003854 |
| 7             | 6             | 0           | -0.874280               | 0.985719  | -0.003136 |
| 8             | 7             | 0           | -1.557697               | -1.326862 | -0.008876 |
| 9             | 1             | 0           | 2.284248                | 2.234419  | -0.003251 |
| 10            | 1             | 0           | -0.082044               | 2.985543  | 0.002197  |
| 11            | 6             | 0           | -2.792322               | -0.903814 | -0.002712 |
| 12            | 6             | 0           | -3.105194               | 0.505849  | 0.001447  |
| 13            | 7             | 0           | -2.167107               | 1.413593  | 0.001061  |
| 14            | 6             | 0           | -4.533149               | 0.966050  | 0.004036  |
| 15            | 1             | 0           | -5.075537               | 0.560146  | 0.862840  |
| 16            | 1             | 0           | -5.054325               | 0.627940  | -0.896712 |
| 17            | 1             | 0           | -4.562823               | 2.053727  | 0.043838  |
| 18            | 6             | 0           | -3.889303               | -1.927159 | 0.007014  |
| 19            | 1             | 0           | -4.484561               | -1.851608 | 0.922234  |
| 20            | 1             | 0           | -4.572396               | -1.784989 | -0.835288 |
| 21            | 1             | 0           | -3.453002               | -2.923051 | -0.049874 |
| 22            | 6             | 0           | 3.221492                | -0.282144 | 0.001452  |
| 23            | 9             | 0           | 3.384383                | -1.609035 | -0.079283 |
| 24            | 9             | 0           | 3.839924                | 0.126163  | 1.126249  |
| 25            | 9             | 0           | 3.897721                | 0.265290  | -1.026252 |

---

---

|                    |      |
|--------------------|------|
| Calculation Type   | SP   |
| Calculation Method | RPM6 |
| Basis Set          | ZDO  |

---

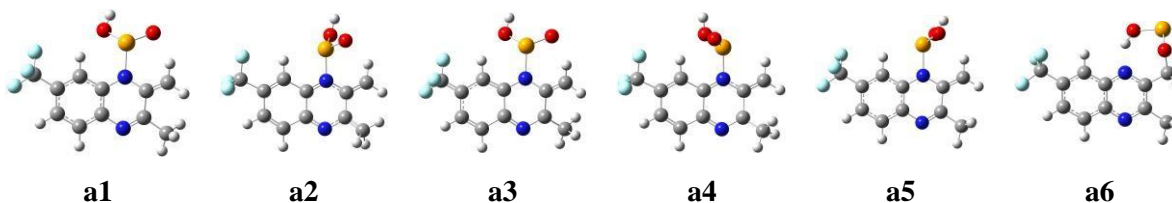



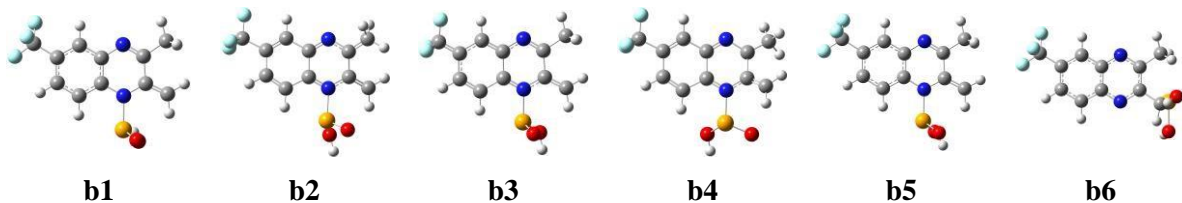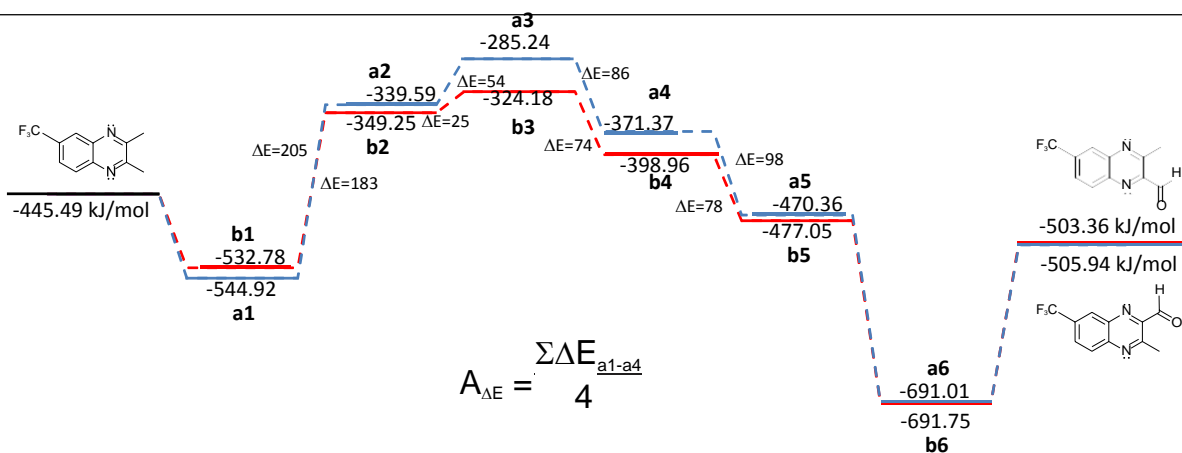

## 2,3-Dimethyl-6-fluoroquinoxaline (5).

|                     |                    |
|---------------------|--------------------|
| Calculation Type    | OPT + FREQ         |
| Calculation Method  | R $\omega$ B97XD   |
| Basis Set           | 6-311++G(d,p)      |
| Charge              | 0                  |
| Spin                | Singlet            |
| E(R $\omega$ B97XD) | -595.79541900 a.u. |
| RMS Gradient Norm   | 0.00011526 a.u.    |
| Imaginary Freq      | 1                  |
| Dipole Moment       | 2.6078 Debye       |
| Point Group         | CS                 |

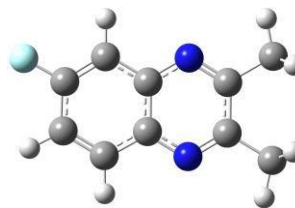

Standard orientation:

| Center Number | Atomic Number | Atomic Type | Coordinates (Angstroms) |           |           |
|---------------|---------------|-------------|-------------------------|-----------|-----------|
|               |               |             | X                       | Y         | Z         |
| 1             | 6             | 0           | -2.112441               | 1.770006  | 0.000000  |
| 2             | 1             | 0           | -0.248621               | 2.822556  | 0.000000  |
| 3             | 6             | 0           | -0.752343               | 1.864784  | 0.000000  |
| 4             | 6             | 0           | -2.073416               | -0.620806 | 0.000000  |
| 5             | 6             | 0           | 0.000000                | 0.669156  | 0.000000  |
| 6             | 6             | 0           | -2.796438               | 0.541502  | 0.000000  |
| 7             | 6             | 0           | -0.660303               | -0.579239 | 0.000000  |
| 8             | 7             | 0           | 1.360258                | 0.736454  | 0.000000  |
| 9             | 1             | 0           | -3.879336               | 0.541509  | 0.000000  |
| 10            | 1             | 0           | -2.558557               | -1.589326 | 0.000000  |
| 11            | 6             | 0           | 2.022605                | -0.389201 | 0.000000  |
| 12            | 6             | 0           | 1.348438                | -1.663635 | 0.000000  |
| 13            | 7             | 0           | 0.045368                | -1.743010 | 0.000000  |
| 14            | 6             | 0           | 2.135008                | -2.942370 | 0.000000  |
| 15            | 1             | 0           | 2.781031                | -3.007644 | 0.880596  |
| 16            | 1             | 0           | 2.781031                | -3.007644 | -0.880596 |
| 17            | 1             | 0           | 1.447315                | -3.786673 | 0.000000  |
| 18            | 6             | 0           | 3.522193                | -0.322673 | 0.000000  |
| 19            | 1             | 0           | 3.937729                | -0.821893 | 0.880410  |
| 20            | 1             | 0           | 3.937729                | -0.821893 | -0.880410 |
| 21            | 1             | 0           | 3.836816                | 0.719711  | 0.000000  |
| 22            | 9             | 0           | -2.852704               | 2.892449  | 0.000000  |

|                    |      |
|--------------------|------|
| Calculation Type   | SP   |
| Calculation Method | RPM6 |
| Basis Set          | ZDO  |

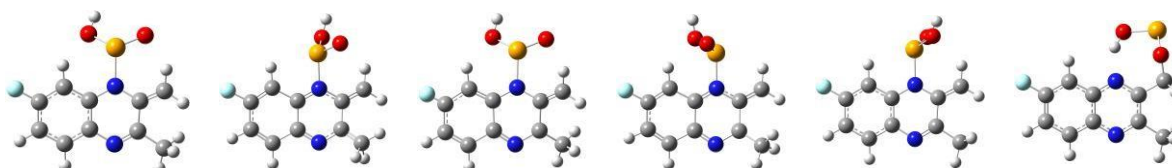

a1

a2

a3

a4

a5

a6

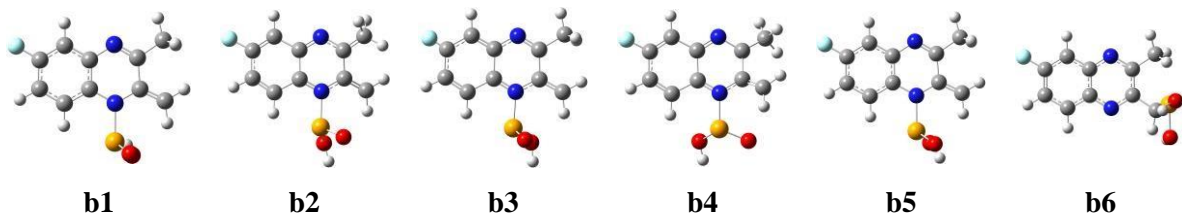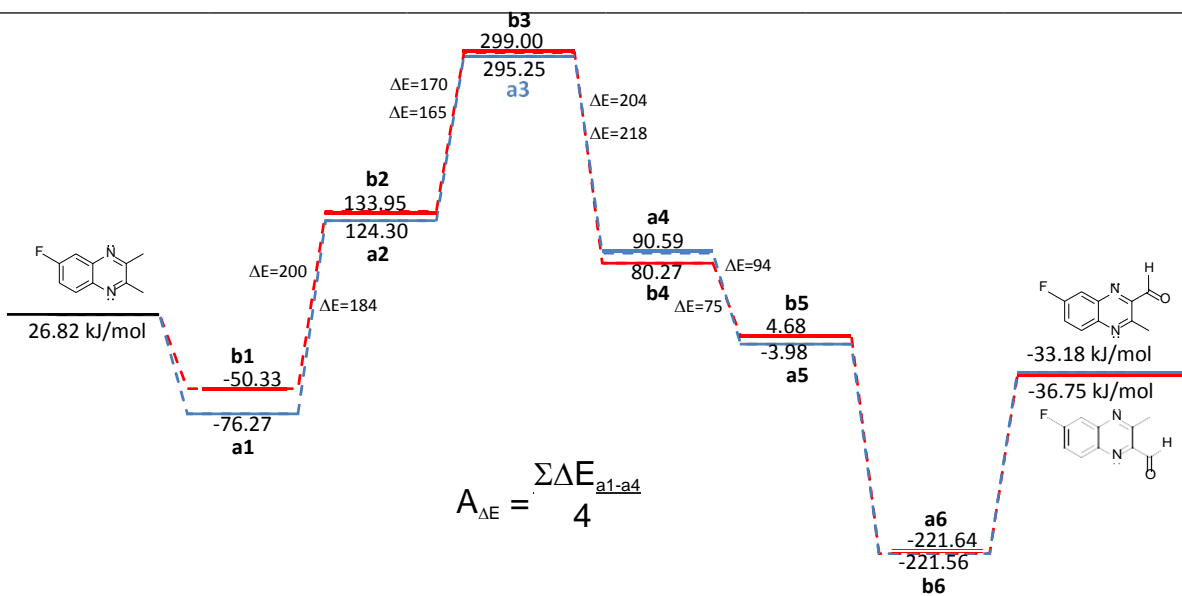

## 2,3-Dimethyl-6-chloroquinoline (6).

|                    |                   |
|--------------------|-------------------|
| Calculation Type   | OPT + FREQ        |
| Calculation Method | RωB97XD           |
| Basis Set          | 6-311++G(d,p)     |
| Charge             | 0                 |
| Spin               | Singlet           |
| E(RωB97XD)         | -956.16091472 a.u |
| RMS Gradient Norm  | 0.00000882 a.u    |
| Imaginary Freq     | 1                 |
| Dipole Moment      | 2.8323 Debye      |
| Point Group        | C1                |

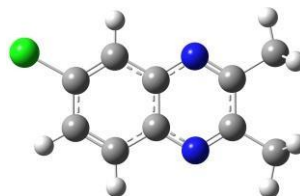

Standard orientation:

| Center Number | Atomic Number | Atomic Type | Coordinates (Angstroms) |           |           |
|---------------|---------------|-------------|-------------------------|-----------|-----------|
|               |               |             | X                       | Y         | Z         |
| 1             | 6             | 0           | -2.145938               | 1.360835  | 0.000286  |
| 2             | 6             | 0           | -0.861256               | 1.832045  | 0.000279  |
| 3             | 6             | 0           | 0.227550                | 0.931147  | -0.000071 |
| 4             | 6             | 0           | -0.022010               | -0.457196 | -0.000470 |
| 5             | 6             | 0           | -1.351961               | -0.935329 | -0.000493 |
| 6             | 6             | 0           | -2.378072               | -0.031939 | -0.000045 |
| 7             | 1             | 0           | -2.988501               | 2.040905  | 0.000586  |
| 8             | 1             | 0           | -0.650101               | 2.894709  | 0.000559  |
| 9             | 1             | 0           | -1.525416               | -2.003802 | -0.000727 |
| 10            | 6             | 0           | 2.221124                | -0.875535 | -0.000406 |
| 11            | 6             | 0           | 2.476507                | 0.544518  | -0.000019 |
| 12            | 6             | 0           | 3.360690                | -1.851946 | 0.000849  |
| 13            | 1             | 0           | 4.002741                | -1.708517 | -0.873274 |
| 14            | 1             | 0           | 3.988247                | -1.721133 | 0.887524  |
| 15            | 1             | 0           | 2.965860                | -2.866610 | -0.009216 |
| 16            | 6             | 0           | 3.884438                | 1.064466  | -0.000256 |
| 17            | 1             | 0           | 4.435249                | 0.710239  | 0.876149  |
| 18            | 1             | 0           | 4.429853                | 0.722580  | -0.884992 |
| 19            | 1             | 0           | 3.866287                | 2.153197  | 0.007114  |
| 20            | 7             | 0           | 1.005354                | -1.351242 | -0.000725 |
| 21            | 7             | 0           | 1.500974                | 1.412008  | 0.000132  |
| 22            | 17            | 0           | -4.031468               | -0.596078 | 0.000148  |

|                    |      |
|--------------------|------|
| Calculation Type   | SP   |
| Calculation Method | RPM6 |
| Basis Set          | ZDO  |

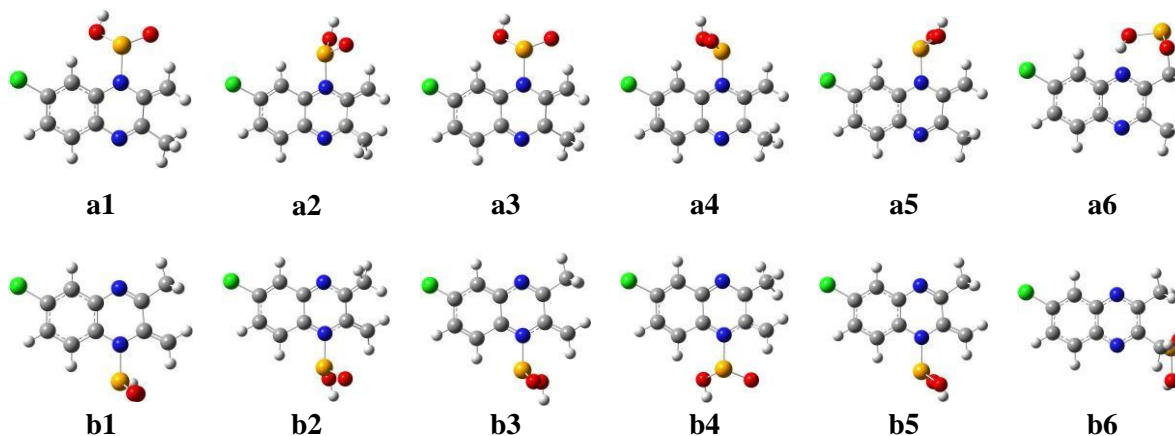

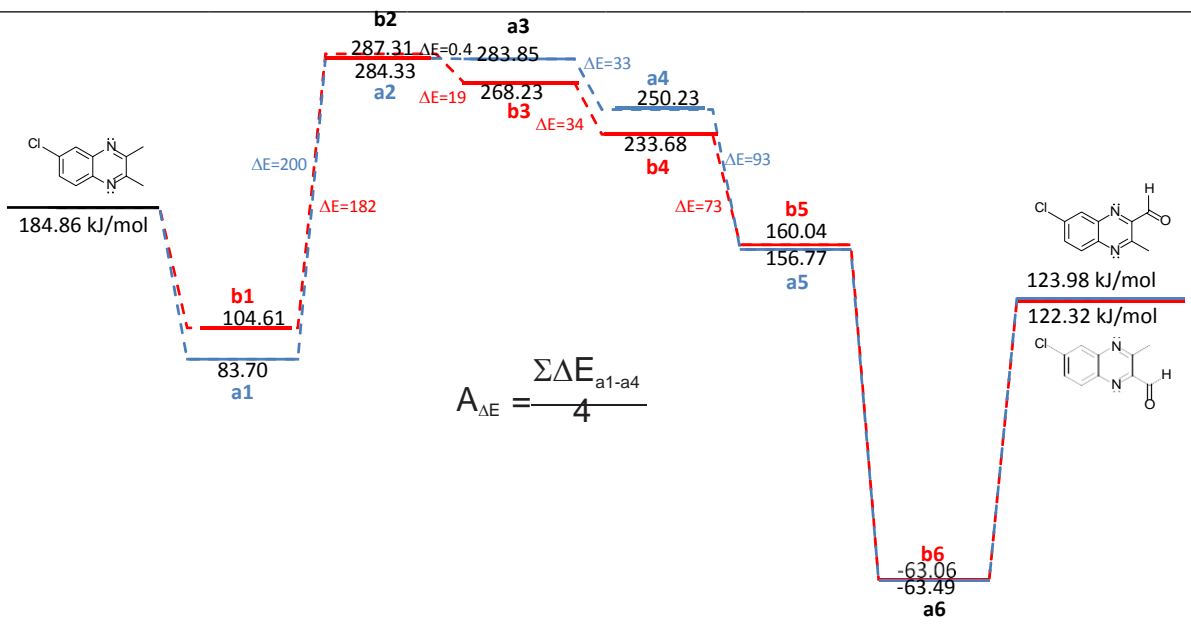

## 2,3-Dimethyl-6-bromoquinoxaline (7).

|                     |                    |
|---------------------|--------------------|
| Calculation Type    | OPT + FREQ         |
| Calculation Method  | R $\omega$ B97XD   |
| Basis Set           | 6-311++G(d,p)      |
| Charge              | 0                  |
| Spin                | Singlet            |
| E(R $\omega$ B97XD) | -3070.1257740 a.u. |
| RMS Gradient Norm   | 0.00001167 a.u.    |
| Imaginary Freq      | 0                  |
| Dipole Moment       | 2.7976 Debye       |
| Point Group         | C1                 |

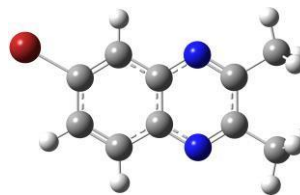

Standard orientation:

| Center Number | Atomic Number | Atomic Type | Coordinates (Angstroms) |           |           |
|---------------|---------------|-------------|-------------------------|-----------|-----------|
|               |               |             | X                       | Y         | Z         |
| 1             | 6             | 0           | -1.406947               | 1.546643  | 0.001124  |
| 2             | 6             | 0           | -0.097809               | 1.946834  | 0.001111  |
| 3             | 6             | 0           | 0.940504                | 0.988627  | -0.000769 |
| 4             | 6             | 0           | 0.616277                | -0.383700 | -0.003017 |
| 5             | 6             | 0           | -0.738096               | -0.788870 | -0.003110 |
| 6             | 6             | 0           | -1.715330               | 0.167912  | -0.000627 |
| 7             | 1             | 0           | -2.207490               | 2.275491  | 0.002737  |
| 8             | 1             | 0           | 0.170495                | 2.996590  | 0.002616  |
| 9             | 1             | 0           | -0.963099               | -1.847779 | -0.004368 |
| 10            | 6             | 0           | 2.833080                | -0.924185 | -0.002361 |
| 11            | 6             | 0           | 3.165220                | 0.480215  | 0.000032  |
| 12            | 6             | 0           | 3.916701                | -1.962069 | 0.004554  |
| 13            | 1             | 0           | 4.600385                | -1.828020 | -0.838671 |
| 14            | 1             | 0           | 4.514648                | -1.895279 | 0.918798  |
| 15            | 1             | 0           | 3.467448                | -2.952213 | -0.052524 |
| 16            | 6             | 0           | 4.599497                | 0.922029  | -0.000440 |
| 17            | 1             | 0           | 5.139062                | 0.510227  | 0.857439  |
| 18            | 1             | 0           | 5.115247                | 0.578257  | -0.902233 |
| 19            | 1             | 0           | 4.642726                | 2.009353  | 0.039325  |
| 20            | 7             | 0           | 1.593113                | -1.332501 | -0.004516 |
| 21            | 7             | 0           | 2.238399                | 1.399482  | 0.000611  |
| 22            | 35            | 0           | -3.542245               | -0.350746 | 0.000721  |

|                    |      |
|--------------------|------|
| Calculation Type   | SP   |
| Calculation Method | RPM6 |
| Basis Set          | ZDO  |

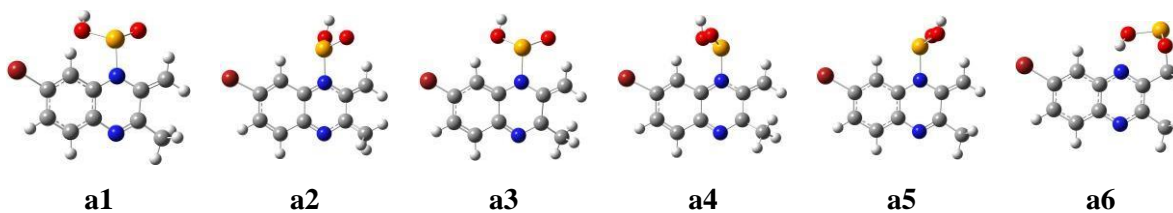

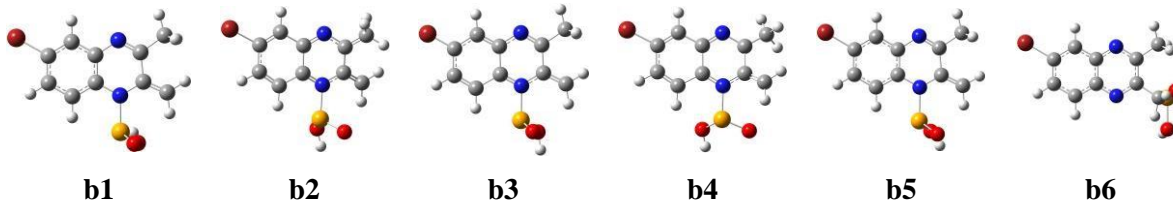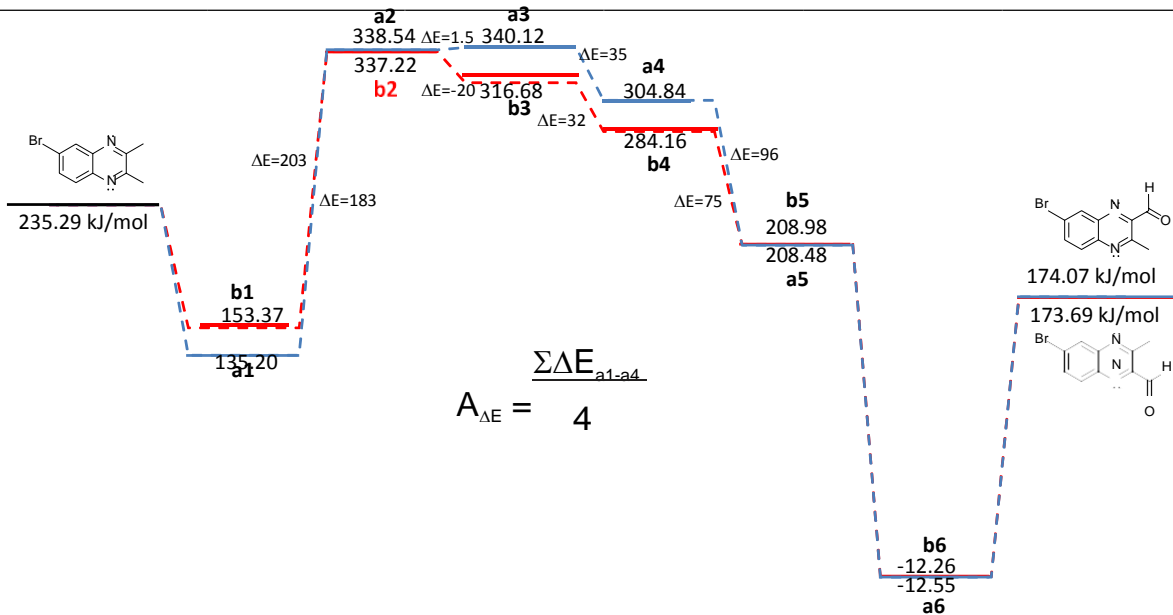

## 2,3-Dimethylquinoxaline-6-carboxylic acid (8).

|                     |                    |
|---------------------|--------------------|
| Calculation Type    | OPT + FREQ         |
| Calculation Method  | R $\omega$ B97XD   |
| Basis Set           | 6-311++G(d,p)      |
| Charge              | 0                  |
| Spin                | Singlet            |
| E(R $\omega$ B97XD) | -685.13023589 a.u. |
| RMS Gradient Norm   | 0.00001072 a.u.    |
| Imaginary Freq      | 0                  |
| Dipole Moment       | 2.6167 Debye       |
| Point Group         | C1                 |

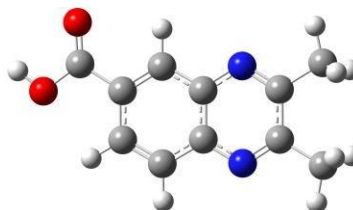

Standard orientation:

| Center Number | Atomic Number | Atomic Type | Coordinates (Angstroms) |           |           |
|---------------|---------------|-------------|-------------------------|-----------|-----------|
|               |               |             | X                       | Y         | Z         |
| 1             | 6             | 0           | 1.833720                | -1.439735 | -0.000157 |
| 2             | 6             | 0           | 0.540847                | -1.886955 | -0.000311 |
| 3             | 6             | 0           | -0.528104               | -0.962515 | -0.001626 |
| 4             | 6             | 0           | -0.253162               | 0.421408  | -0.003754 |
| 5             | 6             | 0           | 1.084492                | 0.865664  | -0.003730 |
| 6             | 6             | 0           | 2.109625                | -0.049532 | -0.001304 |
| 7             | 1             | 0           | 2.656830                | -2.142456 | 0.001231  |
| 8             | 1             | 0           | 0.304065                | -2.944191 | 0.000885  |
| 9             | 1             | 0           | 1.289940                | 1.929356  | -0.004635 |
| 10            | 6             | 0           | -2.487244               | 0.886827  | -0.002170 |
| 11            | 6             | 0           | -2.769047               | -0.530458 | 0.000452  |
| 12            | 6             | 0           | -3.607670               | 1.885091  | 0.004656  |
| 13            | 1             | 0           | -4.283237               | 1.729581  | -0.841387 |
| 14            | 1             | 0           | -4.205404               | 1.794560  | 0.916912  |
| 15            | 1             | 0           | -3.193052               | 2.890472  | -0.048332 |
| 16            | 6             | 0           | -4.186839               | -1.021339 | 0.001215  |
| 17            | 1             | 0           | -4.738416               | -0.628702 | 0.860403  |
| 18            | 1             | 0           | -4.714795               | -0.692790 | -0.899145 |
| 19            | 1             | 0           | -4.192555               | -2.109497 | 0.039141  |
| 20            | 7             | 0           | -1.263366               | 1.336856  | -0.004863 |
| 21            | 7             | 0           | -1.812497               | -1.418024 | 0.000381  |
| 22            | 6             | 0           | 3.504175                | 0.469892  | 0.000916  |
| 23            | 8             | 0           | 3.806399                | 1.634862  | 0.000677  |
| 24            | 8             | 0           | 4.427597                | -0.510682 | 0.003781  |
| 25            | 1             | 0           | 5.290935                | -0.081684 | 0.005508  |

|                    |      |
|--------------------|------|
| Calculation Type   | SP   |
| Calculation Method | RPM6 |
| Basis Set          | ZDO  |

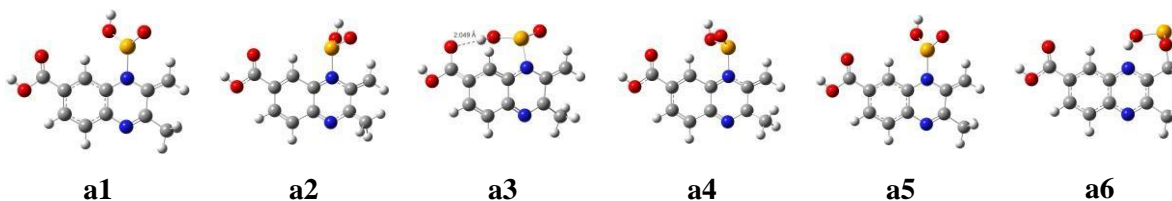



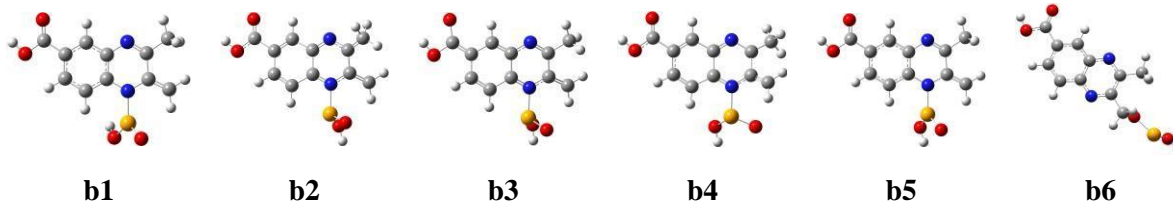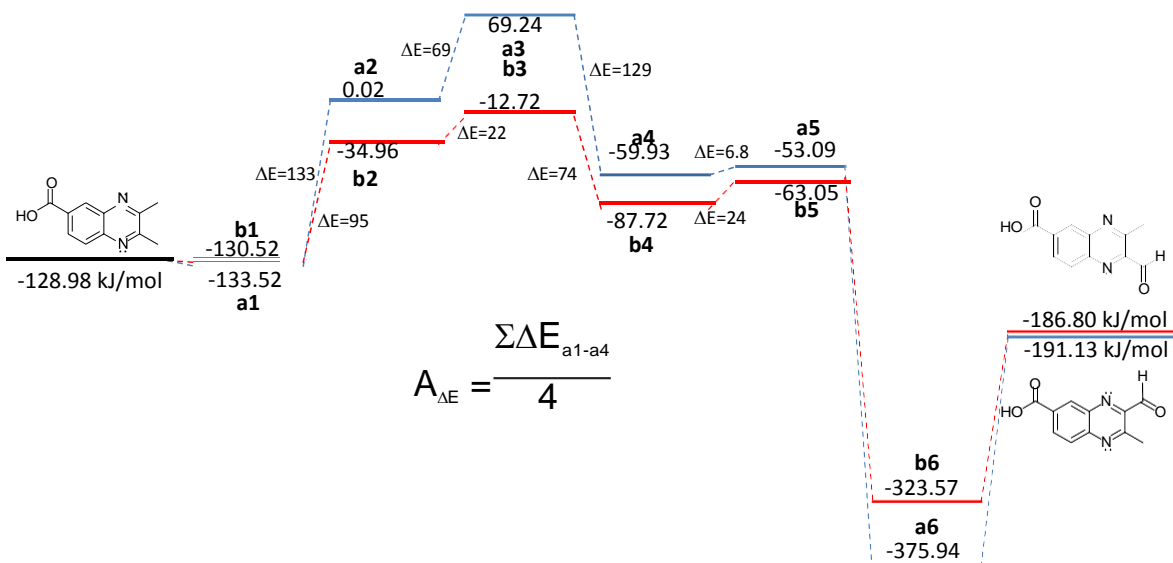

## Methyl 2,3-dimethylquinoxaline-6-carboxylate (9).

|                    |                    |
|--------------------|--------------------|
| Calculation Type   | OPT + FREQ         |
| Calculation Method | RωB97XD            |
| Basis Set          | 6-311++G(d,p)      |
| Charge             | 0                  |
| Spin               | Singlet            |
| E(RωB97XD)         | -724.42622001 a.u. |
| RMS Gradient Norm  | 0.00000603 a.u.    |
| Imaginary Freq     | 0                  |
| Dipole Moment      | 2.0624 Debye       |
| Point Group        | C1                 |

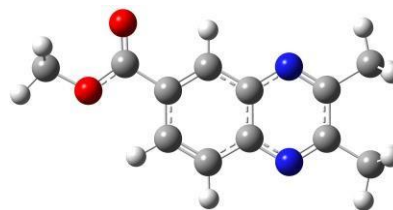

Standard orientation:

| Center Number | Atomic Number | Atomic Type | Coordinates (Angstroms) |           |           |
|---------------|---------------|-------------|-------------------------|-----------|-----------|
|               |               |             | X                       | Y         | Z         |
| 1             | 6             | 0           | 1.419535                | -1.431229 | -0.002563 |
| 2             | 6             | 0           | 0.128201                | -1.882867 | -0.002128 |
| 3             | 6             | 0           | -0.944036               | -0.962042 | -0.002742 |
| 4             | 6             | 0           | -0.672531               | 0.422601  | -0.005345 |
| 5             | 6             | 0           | 0.664373                | 0.870582  | -0.005991 |
| 6             | 6             | 0           | 1.692542                | -0.040426 | -0.003736 |
| 7             | 1             | 0           | 2.245994                | -2.129891 | -0.001419 |
| 8             | 1             | 0           | -0.105142               | -2.940945 | -0.000676 |
| 9             | 1             | 0           | 0.866636                | 1.934861  | -0.006890 |
| 10            | 6             | 0           | -2.908205               | 0.881351  | -0.001899 |
| 11            | 6             | 0           | -3.186181               | -0.536022 | 0.001605  |
| 12            | 6             | 0           | -4.031243               | 1.876934  | 0.005566  |
| 13            | 1             | 0           | -4.707593               | 1.719209  | -0.839480 |
| 14            | 1             | 0           | -4.627658               | 1.785879  | 0.918663  |
| 15            | 1             | 0           | -3.619046               | 2.883266  | -0.048810 |
| 16            | 6             | 0           | -4.602772               | -1.030950 | 0.004349  |
| 17            | 1             | 0           | -5.154783               | -0.639252 | 0.863710  |
| 18            | 1             | 0           | -5.132795               | -0.705059 | -0.895810 |
| 19            | 1             | 0           | -4.605199               | -2.119114 | 0.043359  |
| 20            | 7             | 0           | -1.685364               | 1.334907  | -0.005858 |
| 21            | 7             | 0           | -2.227034               | -1.421056 | 0.000697  |
| 22            | 6             | 0           | 3.088210                | 0.486290  | -0.000800 |
| 23            | 8             | 0           | 3.376791                | 1.655657  | 0.000055  |
| 24            | 8             | 0           | 4.001390                | -0.494845 | 0.001690  |
| 25            | 6             | 0           | 5.365890                | -0.074591 | 0.007445  |
| 26            | 1             | 0           | 5.579573                | 0.516290  | 0.899571  |
| 27            | 1             | 0           | 5.953373                | -0.990175 | 0.005677  |
| 28            | 1             | 0           | 5.585286                | 0.523680  | -0.878303 |

|                    |      |
|--------------------|------|
| Calculation Type   | SP   |
| Calculation Method | RPM6 |
| Basis Set          | ZDO  |

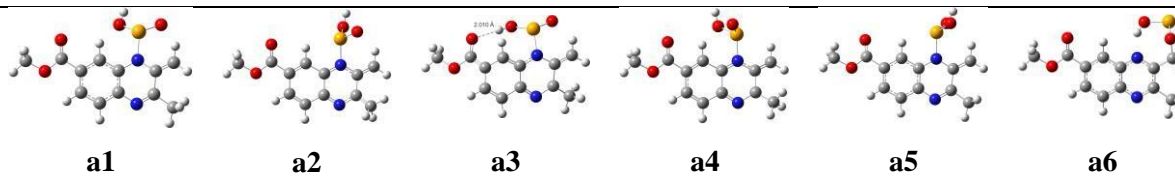

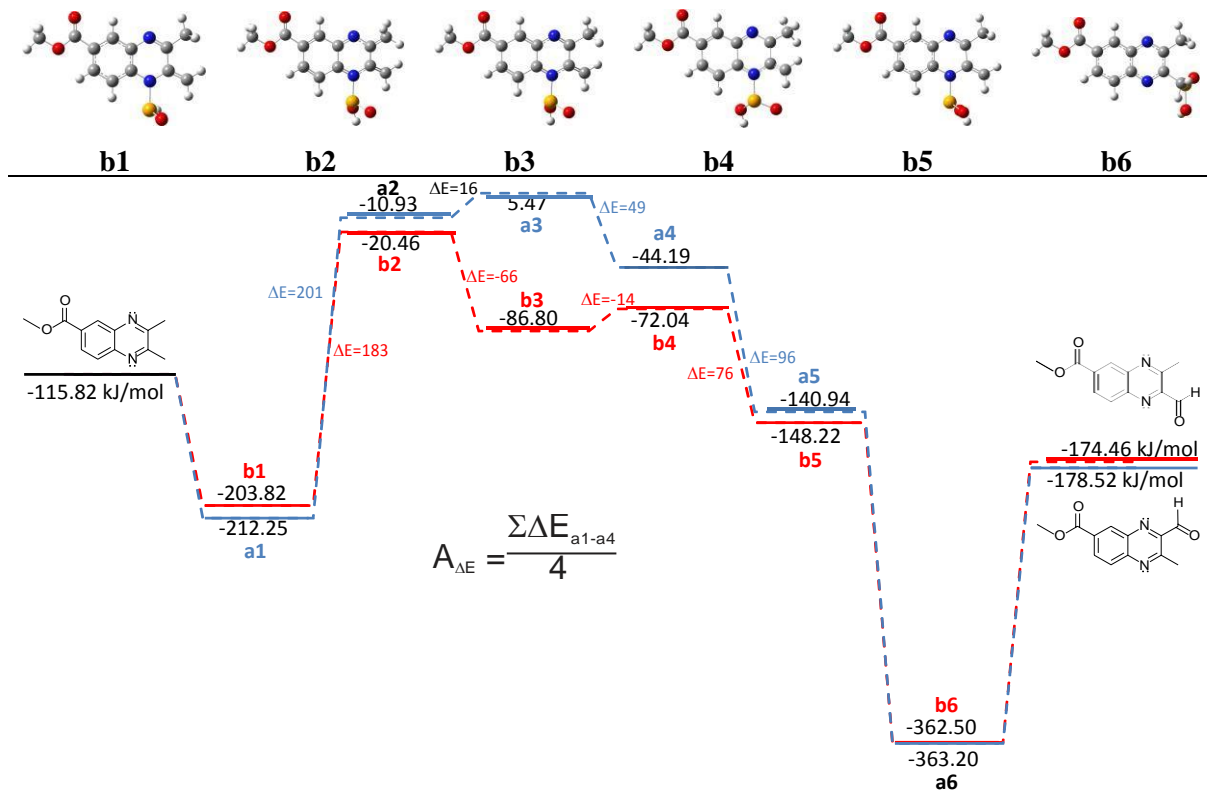

**(2,3-dimethyl-6-quinoxaliny)phenyl-methanone (10).**

---

|                     |                    |
|---------------------|--------------------|
| Calculation Type    | OPT + FREQ         |
| Calculation Method  | R $\omega$ B97XD   |
| Basis Set           | 6-311++G(d,p)      |
| Charge              | 0                  |
| Spin                | Singlet            |
| E(R $\omega$ B97XD) | -840.90586078 a.u. |
| RMS Gradient Norm   | 0.00001100 a.u.    |
| Imaginary Freq      | 0                  |
| Dipole Moment       | 4.1587 Debye       |
| Point Group         | C1                 |

---

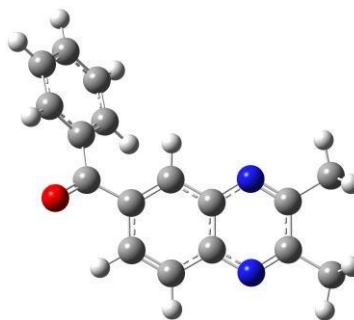

Standard orientation:

---

| Center Number | Atomic Number | Atomic Type | Coordinates (Angstroms) |           |           |
|---------------|---------------|-------------|-------------------------|-----------|-----------|
|               |               |             | X                       | Y         | Z         |
| 1             | 6             | 0           | 0.073697                | 2.339445  | 0.322935  |
| 2             | 6             | 0           | 1.431920                | 2.283770  | 0.460037  |
| 3             | 6             | 0           | 2.117904                | 1.071477  | 0.213003  |
| 4             | 6             | 0           | 1.389283                | -0.072913 | -0.171254 |
| 5             | 6             | 0           | -0.016253               | 0.000332  | -0.288817 |
| 6             | 6             | 0           | -0.667508               | 1.185517  | -0.041589 |
| 7             | 1             | 0           | -0.465369               | 3.264989  | 0.485330  |
| 8             | 1             | 0           | 2.013368                | 3.151403  | 0.748745  |
| 9             | 1             | 0           | -0.546161               | -0.893302 | -0.596747 |
| 10            | 6             | 0           | 3.319272                | -1.284066 | -0.299428 |
| 11            | 6             | 0           | 4.065271                | -0.113335 | 0.095296  |
| 12            | 6             | 0           | 4.025054                | -2.579722 | -0.573682 |
| 13            | 1             | 0           | 4.767423                | -2.465162 | -1.369110 |
| 14            | 1             | 0           | 4.556500                | -2.933045 | 0.315209  |
| 15            | 1             | 0           | 3.295864                | -3.330817 | -0.873067 |
| 16            | 6             | 0           | 5.558280                | -0.174094 | 0.231659  |
| 17            | 1             | 0           | 5.856444                | -0.923008 | 0.971346  |
| 18            | 1             | 0           | 6.027664                | -0.452683 | -0.716631 |
| 19            | 1             | 0           | 5.932897                | 0.800450  | 0.540759  |
| 20            | 7             | 0           | 2.020631                | -1.252636 | -0.426450 |
| 21            | 7             | 0           | 3.472573                | 1.023636  | 0.342012  |
| 22            | 6             | 0           | -2.146319               | 1.337852  | -0.232786 |
| 23            | 8             | 0           | -2.604366               | 2.412213  | -0.561189 |
| 24            | 6             | 0           | -3.051011               | 0.162271  | -0.026593 |
| 25            | 6             | 0           | -2.789922               | -0.829484 | 0.920185  |
| 26            | 6             | 0           | -4.231653               | 0.109004  | -0.769719 |
| 27            | 6             | 0           | -3.697793               | -1.863150 | 1.116026  |
| 28            | 1             | 0           | -1.887057               | -0.783984 | 1.518216  |
| 29            | 6             | 0           | -5.126090               | -0.934264 | -0.587682 |
| 30            | 1             | 0           | -4.433326               | 0.896457  | -1.486376 |
| 31            | 6             | 0           | -4.860703               | -1.920980 | 0.357514  |
| 32            | 1             | 0           | -3.496119               | -2.622840 | 1.862472  |
| 33            | 1             | 0           | -6.035439               | -0.976883 | -1.176259 |
| 34            | 1             | 0           | -5.564763               | -2.732243 | 0.506056  |

---

---

|                    |      |
|--------------------|------|
| Calculation Type   | SP   |
| Calculation Method | RPM6 |
| Basis Set          | ZDO  |

---

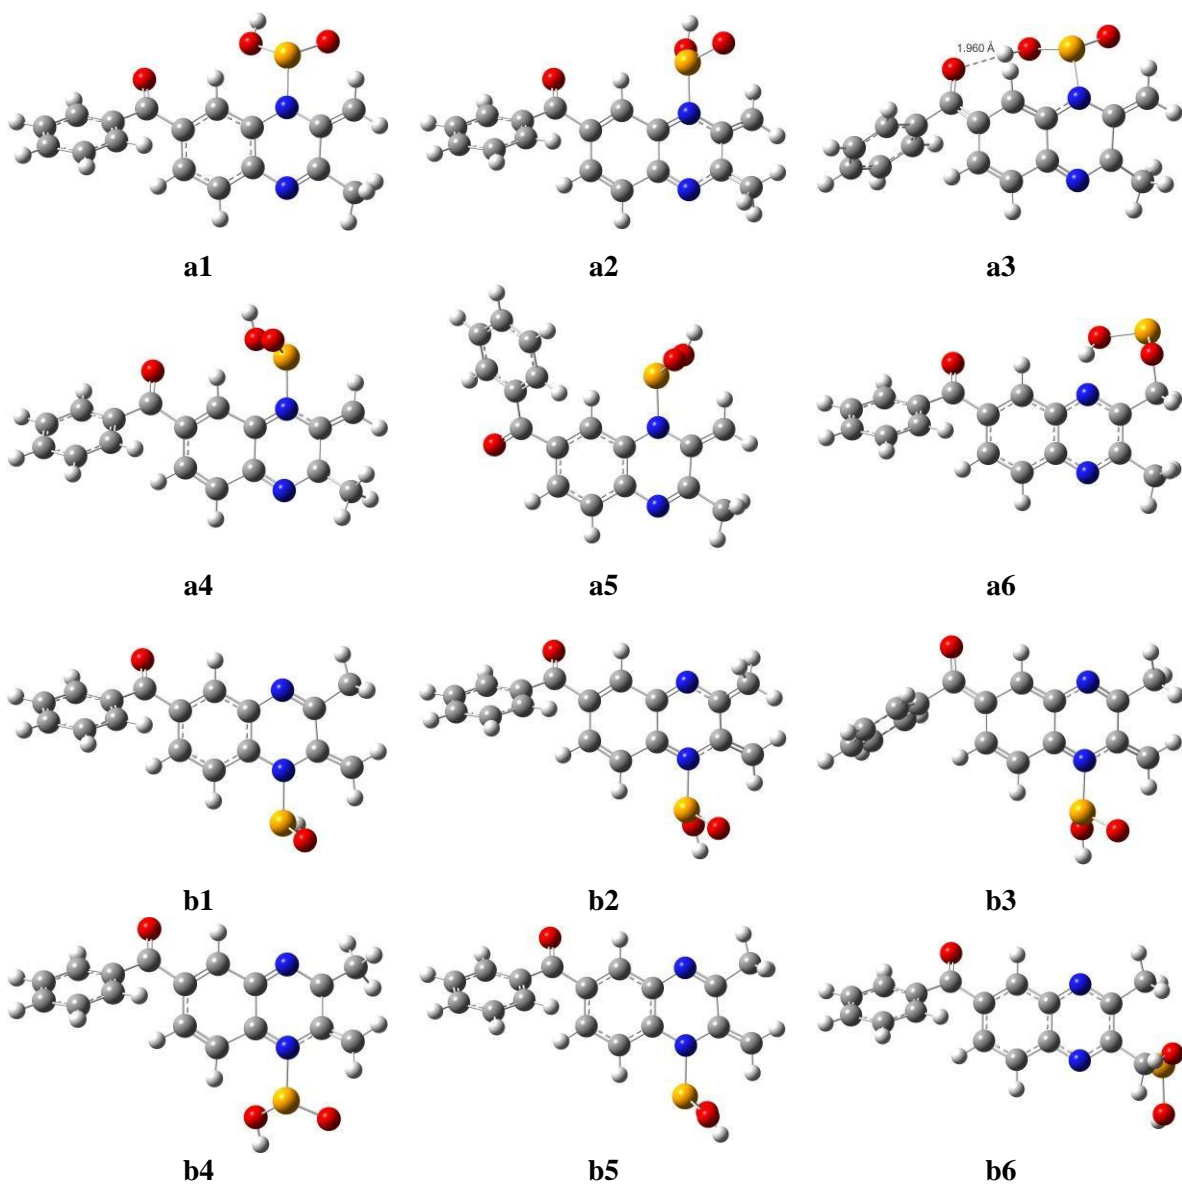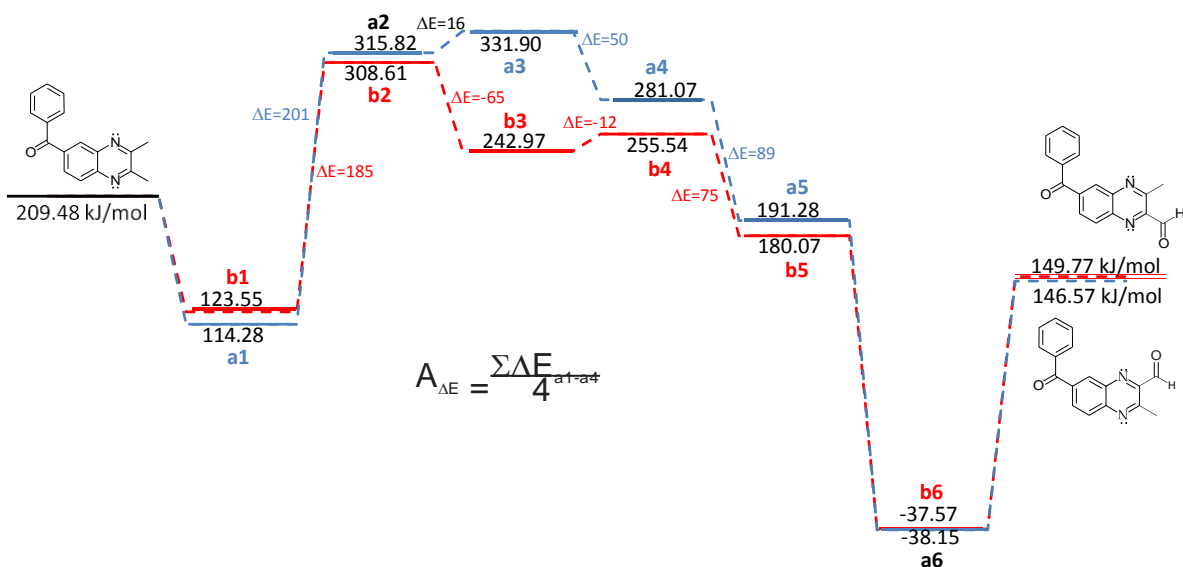



## 2,2',3,3'-Tetramethyl-6,6'-biquinoxaline (11).

|                     |                    |
|---------------------|--------------------|
| Calculation Type    | OPT + FREQ         |
| Calculation Method  | R $\omega$ B97XD   |
| Basis Set           | 6-311++G(d,p)      |
| Charge              | 0                  |
| Spin                | Singlet            |
| E(R $\omega$ B97XD) | -991.91299620 a.u. |
| RMS Gradient Norm   | 0.00003795 a.u.    |
| Imaginary Freq      | 2                  |
| Dipole Moment       | 0.9521 Debye       |
| Point Group         | C1                 |

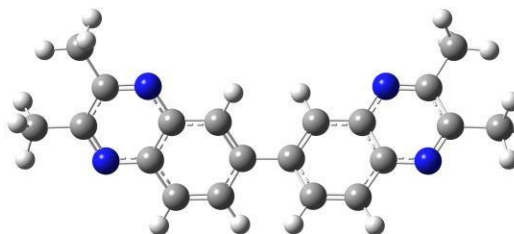

Standard orientation:

| Center Number | Atomic Number | Atomic Type | Coordinates (Angstroms) |           |           |
|---------------|---------------|-------------|-------------------------|-----------|-----------|
|               |               |             | X                       | Y         | Z         |
| 1             | 6             | 0           | -1.401378               | -1.986717 | -0.590949 |
| 2             | 6             | 0           | -2.760150               | -2.014894 | -0.739513 |
| 3             | 6             | 0           | -3.534940               | -0.892300 | -0.367547 |
| 4             | 6             | 0           | -1.483312               | 0.255039  | 0.294437  |
| 5             | 6             | 0           | -0.738444               | -0.841489 | -0.070687 |
| 6             | 1             | 0           | -0.810154               | -2.843260 | -0.896222 |
| 7             | 1             | 0           | -3.271061               | -2.879341 | -1.147027 |
| 8             | 1             | 0           | -1.019229               | 1.138434  | 0.718149  |
| 9             | 6             | 0           | -4.905725               | 1.299363  | 0.384364  |
| 10            | 6             | 0           | -5.564589               | 0.136345  | -0.153739 |
| 11            | 6             | 0           | 0.738415                | -0.841589 | 0.069246  |
| 12            | 6             | 0           | 1.483549                | 0.254570  | -0.296446 |
| 13            | 6             | 0           | 1.401025                | -1.986542 | 0.590520  |
| 14            | 6             | 0           | 2.888863                | 0.248219  | -0.153787 |
| 15            | 1             | 0           | 1.019717                | 1.137732  | -0.720919 |
| 16            | 6             | 0           | 2.759723                | -2.014729 | 0.739723  |
| 17            | 1             | 0           | 0.809587                | -2.842801 | 0.896174  |
| 18            | 6             | 0           | 3.534755                | -0.892402 | 0.367473  |
| 19            | 1             | 0           | 3.270371                | -2.878915 | 1.148121  |
| 20            | 6             | 0           | 4.906062                | 1.298726  | -0.385071 |
| 21            | 6             | 0           | 5.564519                | 0.136230  | 0.154693  |
| 22            | 6             | 0           | -5.669162               | 2.524955  | 0.810286  |
| 23            | 1             | 0           | -5.484563               | 2.719861  | 1.869257  |
| 24            | 1             | 0           | -5.308559               | 3.392440  | 0.252892  |
| 25            | 1             | 0           | -6.743150               | 2.434289  | 0.655989  |
| 26            | 6             | 0           | -7.057628               | 0.087483  | -0.321719 |
| 27            | 1             | 0           | -7.569359               | 0.217158  | 0.636291  |
| 28            | 1             | 0           | -7.407900               | 0.877574  | -0.992231 |
| 29            | 1             | 0           | -7.333890               | -0.878489 | -0.741638 |
| 30            | 6             | 0           | 5.669656                | 2.524618  | -0.809877 |
| 31            | 1             | 0           | 5.472758                | 2.729501  | -1.864661 |
| 32            | 1             | 0           | 5.320096                | 3.388890  | -0.240413 |
| 33            | 1             | 0           | 6.745014                | 2.428001  | -0.669413 |
| 34            | 6             | 0           | 7.057327                | 0.087883  | 0.324872  |
| 35            | 1             | 0           | 7.570331                | 0.214303  | -0.632898 |
| 36            | 1             | 0           | 7.406762                | 0.880202  | 0.993177  |

|    |   |   |           |           |           |
|----|---|---|-----------|-----------|-----------|
| 37 | 1 | 0 | 7.332982  | -0.876729 | 0.748300  |
| 38 | 7 | 0 | 3.607700  | 1.339488  | -0.529155 |
| 39 | 7 | 0 | 4.885383  | -0.921835 | 0.515050  |
| 40 | 7 | 0 | -3.607249 | 1.340306  | 0.527347  |
| 41 | 7 | 0 | -4.885689 | -0.921903 | -0.514011 |
| 42 | 6 | 0 | -2.888692 | 0.248691  | 0.152464  |

Calculation Type  
Calculation Method  
Basis Set

SP  
RPM6  
ZDO

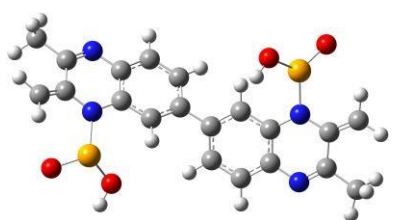

**a1**

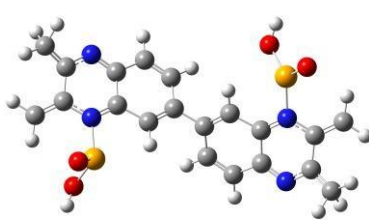

**a2**

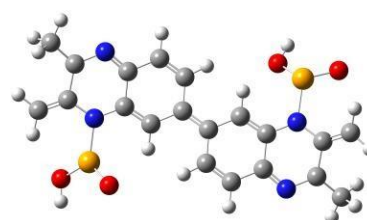

**a3**

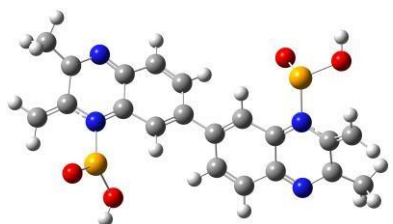

**a4**

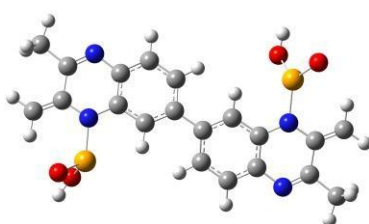

**a5**

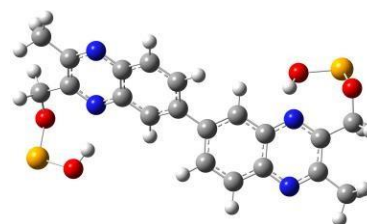

**a6**

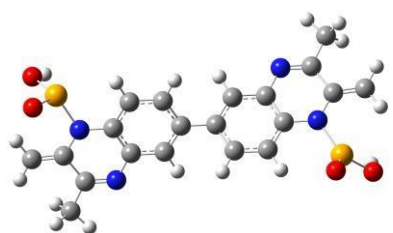

**b1**

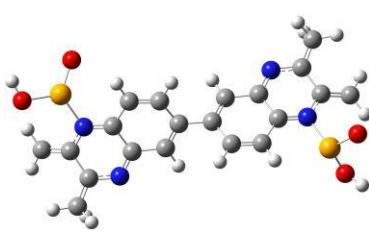

**b2**

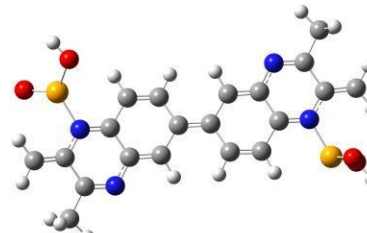

**b3**

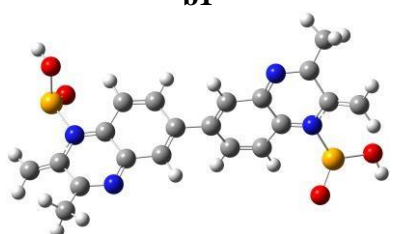

**b4**

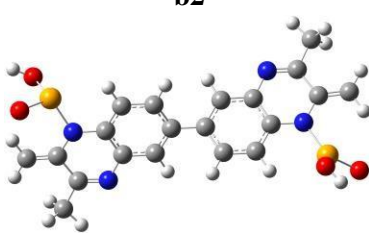

**b5**

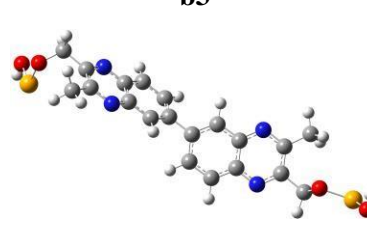

**b6**

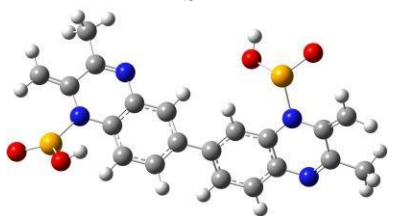

**c1**

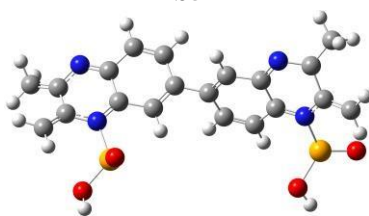

**c2<sub>a</sub>**

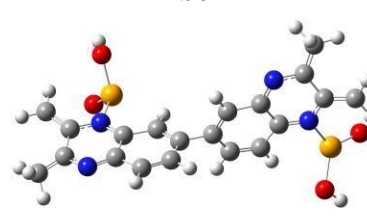

**c2<sub>b</sub>**



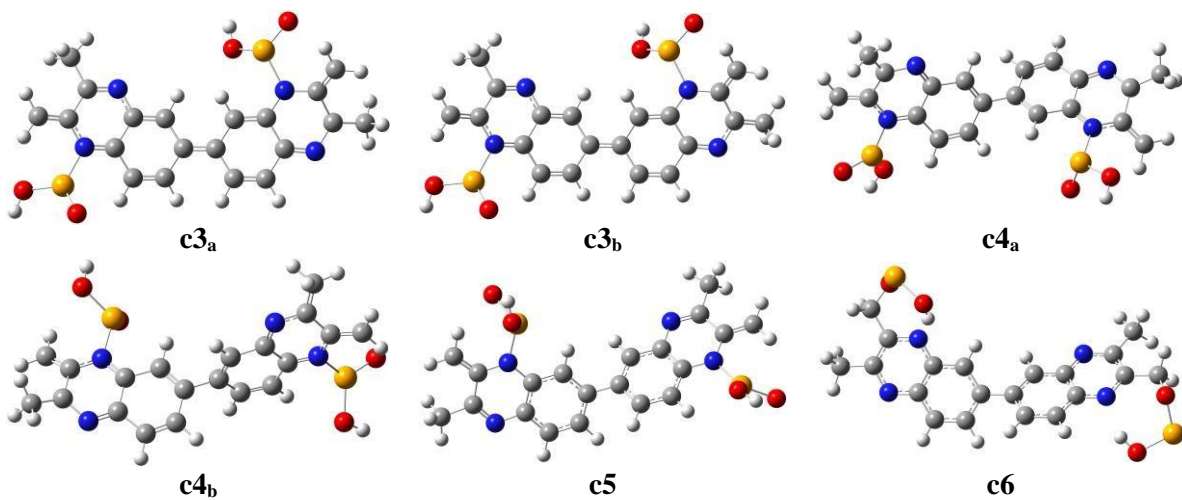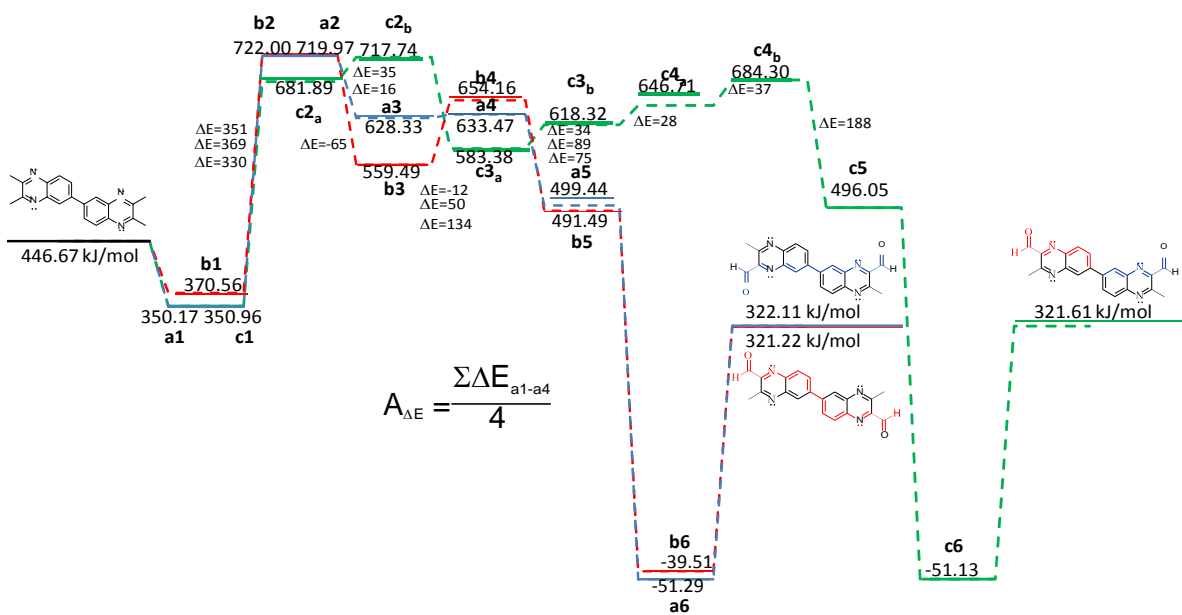

## 2,3-Dimethyl-6-methoxyquinoxaline (12).

|                     |                    |
|---------------------|--------------------|
| Calculation Type    | OPT + FREQ         |
| Calculation Method  | R $\omega$ B97XD   |
| Basis Set           | 6-311++G(d,p)      |
| Charge              | 0                  |
| Spin                | Singlet            |
| E(R $\omega$ B97XD) | -611.07313689 a.u. |
| RMS Gradient Norm   | 0.00001243 a.u.    |
| Imaginary Freq      | 0                  |
| Dipole Moment       | 1.1334 Debye       |
| Point Group         | C1                 |

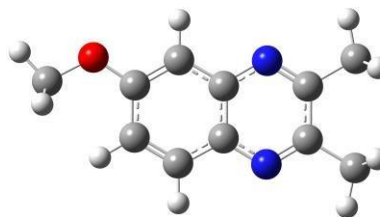

Standard orientation:

| Center Number | Atomic Number | Atomic Type | Coordinates (Angstroms) |           |           |
|---------------|---------------|-------------|-------------------------|-----------|-----------|
|               |               |             | X                       | Y         | Z         |
| 1             | 6             | 0           | -2.341429               | -0.275585 | -0.000443 |
| 2             | 1             | 0           | -1.357860               | -2.176158 | -0.002059 |
| 3             | 6             | 0           | -1.238496               | -1.100089 | -0.001480 |
| 4             | 6             | 0           | -0.923453               | 1.681653  | 0.000468  |
| 5             | 6             | 0           | 0.052471                | -0.545019 | -0.001258 |
| 6             | 6             | 0           | -2.180061               | 1.131884  | 0.000354  |
| 7             | 6             | 0           | 0.219778                | 0.858542  | -0.000226 |
| 8             | 7             | 0           | 1.139916                | -1.370783 | -0.001772 |
| 9             | 1             | 0           | -3.042493               | 1.785360  | 0.001052  |
| 10            | 1             | 0           | -0.781770               | 2.756107  | 0.001156  |
| 11            | 6             | 0           | 2.321001                | -0.816664 | -0.000914 |
| 12            | 6             | 0           | 2.488641                | 0.616972  | 0.000018  |
| 13            | 7             | 0           | 1.460334                | 1.419925  | 0.000373  |
| 14            | 6             | 0           | 3.861852                | 1.224702  | -0.000587 |
| 15            | 1             | 0           | 4.424315                | 0.929327  | -0.891694 |
| 16            | 1             | 0           | 4.440055                | 0.898801  | 0.869338  |
| 17            | 1             | 0           | 3.773307                | 2.310014  | 0.018309  |
| 18            | 6             | 0           | 3.521526                | -1.718652 | 0.002359  |
| 19            | 1             | 0           | 4.162878                | -1.524973 | -0.862554 |
| 20            | 1             | 0           | 4.129533                | -1.557453 | 0.897832  |
| 21            | 1             | 0           | 3.192999                | -2.756593 | -0.021835 |
| 22            | 8             | 0           | -3.551938               | -0.886217 | -0.000307 |
| 23            | 6             | 0           | -4.718441               | -0.091705 | 0.001301  |
| 24            | 1             | 0           | -4.777923               | 0.538398  | -0.893173 |
| 25            | 1             | 0           | -5.553265               | -0.790319 | 0.001452  |
| 26            | 1             | 0           | -4.776357               | 0.536991  | 0.896880  |

|                    |      |
|--------------------|------|
| Calculation Type   | SP   |
| Calculation Method | RPM6 |
| Basis Set          | ZDO  |

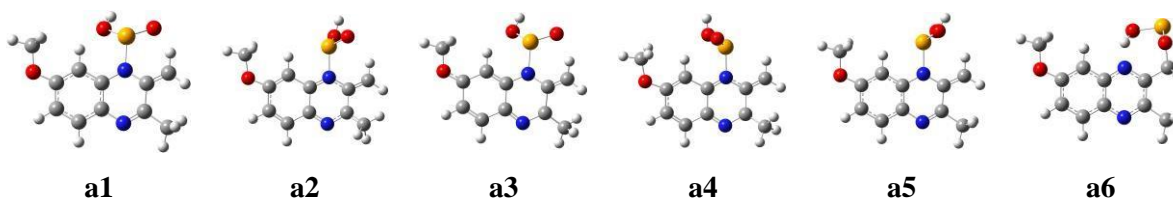

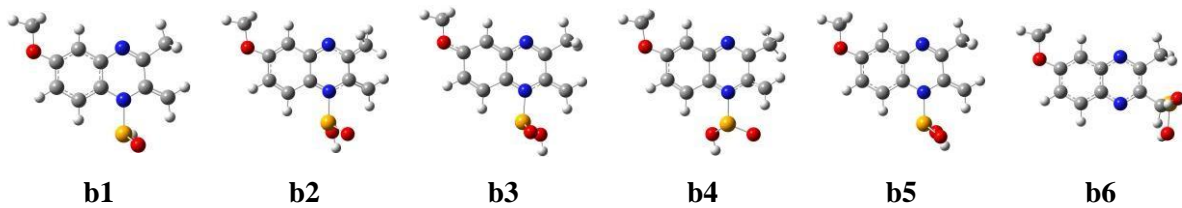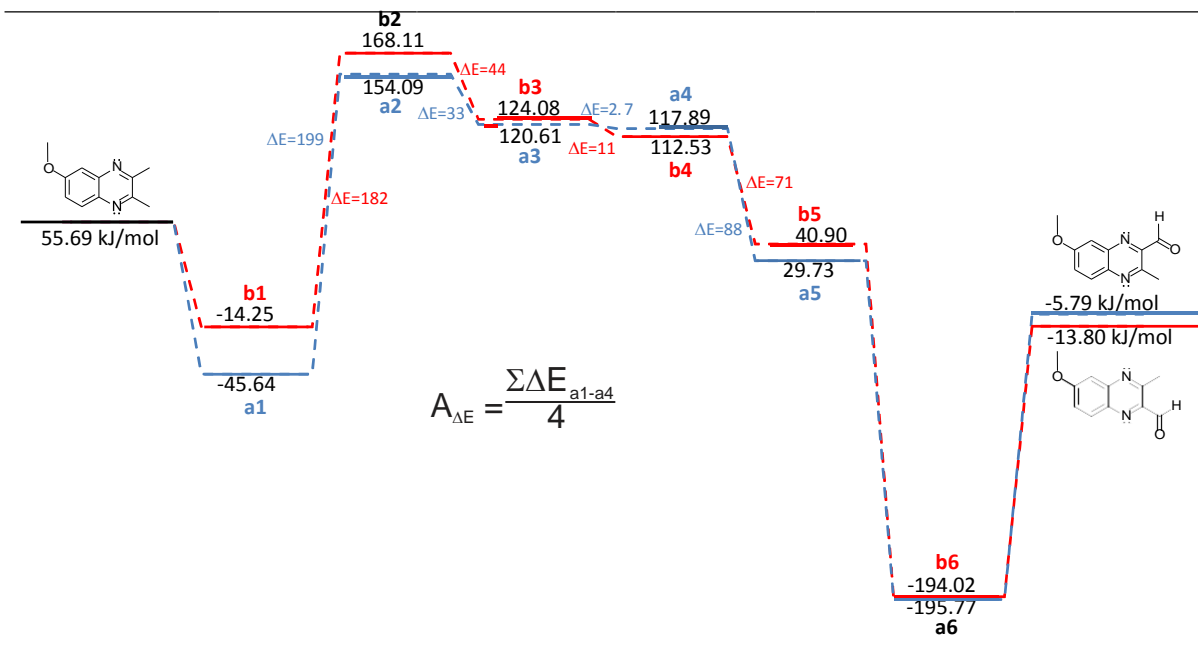

### 6-Hydroxy-2,3-dimethylquinoxaline (13).

Calculation Type OPT + FREQ  
Calculation Method RωB97XD  
Basis Set 6-311++G(d,p)  
Charge 0  
Spin Singlet  
E(RωB97XD) -571.77845033 a.u.  
RMS Gradient Norm 0.00001115 a.u.  
Imaginary Freq 0  
Dipole Moment 1.4121 Debye  
Point Group C1

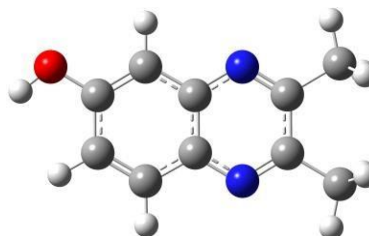

Standard orientation: -----

| Center Number | Atomic Number | Atomic Type | Coordinates (Angstroms) |           |           |
|---------------|---------------|-------------|-------------------------|-----------|-----------|
|               |               |             | X                       | Y         | Z         |
| 1             | 6             | 0           | -2.757641               | -0.296872 | -0.000099 |
| 2             | 1             | 0           | -1.769637               | -2.195564 | -0.000044 |
| 3             | 6             | 0           | -1.658913               | -1.118709 | -0.000037 |
| 4             | 6             | 0           | -1.358002               | 1.673482  | 0.000002  |
| 5             | 6             | 0           | -0.368614               | -0.551956 | 0.000011  |
| 6             | 6             | 0           | -2.605249               | 1.111153  | -0.000006 |
| 7             | 6             | 0           | -0.209339               | 0.851935  | -0.000016 |
| 8             | 7             | 0           | 0.722211                | -1.370045 | 0.000016  |
| 9             | 1             | 0           | -3.487933               | 1.744601  | 0.000071  |
| 10            | 1             | 0           | -1.221407               | 2.748404  | 0.000040  |
| 11            | 6             | 0           | 1.901514                | -0.809331 | 0.000054  |
| 12            | 6             | 0           | 2.060787                | 0.623347  | 0.000060  |
| 13            | 7             | 0           | 1.026387                | 1.420152  | 0.000033  |
| 14            | 6             | 0           | 3.429731                | 1.240275  | -0.000037 |
| 15            | 1             | 0           | 4.001823                | 0.933757  | -0.881069 |
| 16            | 1             | 0           | 4.002409                | 0.932840  | 0.880285  |
| 17            | 1             | 0           | 3.334081                | 2.325138  | 0.000540  |
| 18            | 6             | 0           | 3.106176                | -1.705473 | -0.000020 |
| 19            | 1             | 0           | 3.730371                | -1.524324 | -0.880218 |
| 20            | 1             | 0           | 3.729777                | -1.525152 | 0.880773  |
| 21            | 1             | 0           | 2.782702                | -2.745255 | -0.000591 |
| 22            | 8             | 0           | -3.989820               | -0.870079 | 0.000070  |
| 23            | 1             | 0           | -4.666508               | -0.191673 | -0.000158 |

Calculation Type SP  
Calculation Method RPM6  
Basis Set ZDO

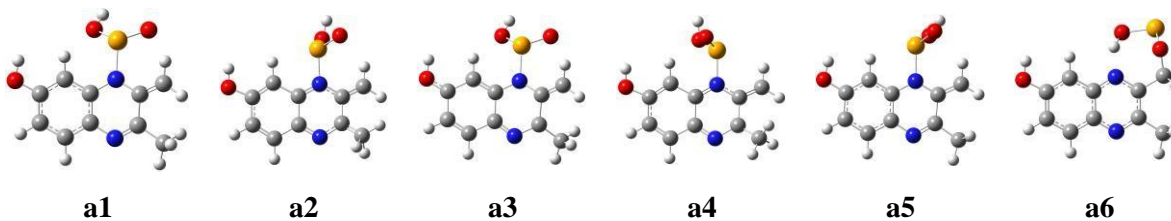

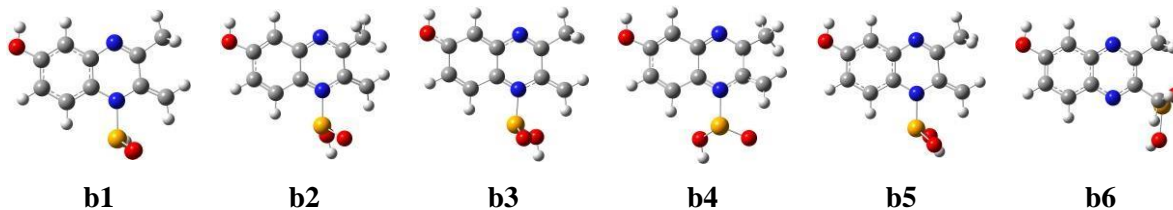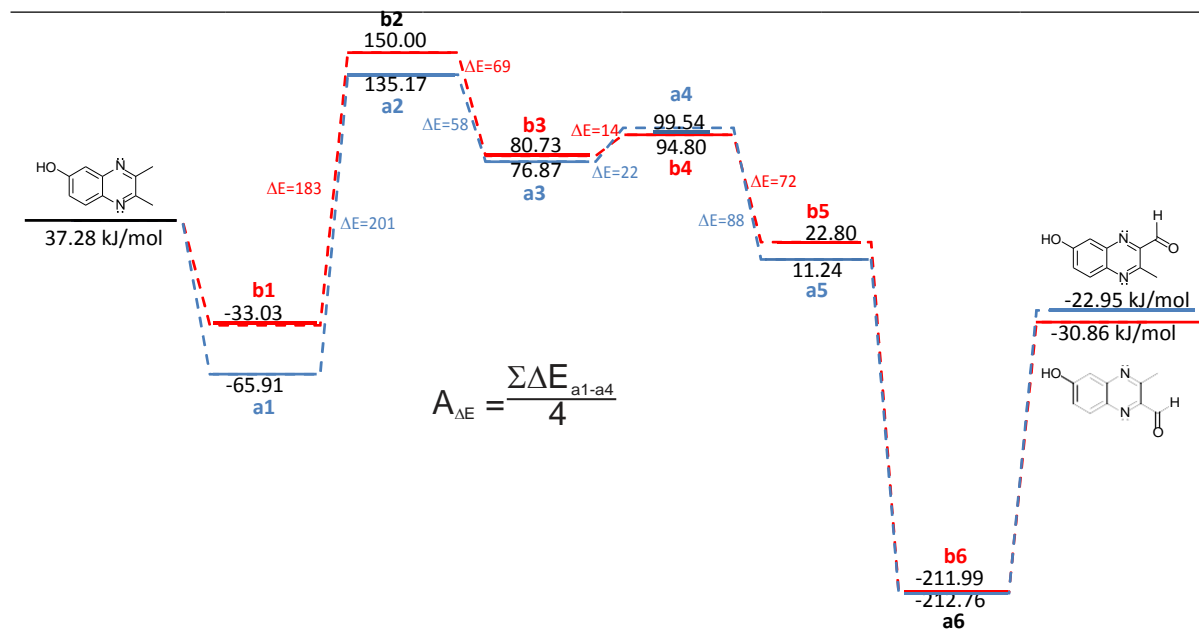

## 6-Amino-2,3-dimethylquinoxaline (14).

---

|                     |                    |
|---------------------|--------------------|
| Calculation Type    | OPT + FREQ         |
| Calculation Method  | R $\omega$ B97XD   |
| Basis Set           | 6-311++G(d,p)      |
| Charge              | 0                  |
| Spin                | Singlet            |
| E(R $\omega$ B97XD) | -551.91373315 a.u. |
| RMS Gradient Norm   | 0.00003059 a.u.    |
| Imaginary Freq      | 1                  |
| Dipole Moment       | 1.5761 Debye       |
| Point Group         | CS                 |

---

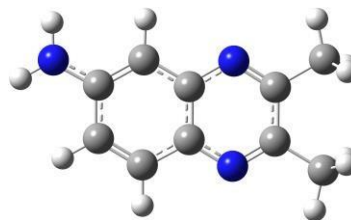

Standard orientation:

---

| Center Number | Atomic Number | Atomic Type | Coordinates (Angstroms) |           |           |
|---------------|---------------|-------------|-------------------------|-----------|-----------|
|               |               |             | X                       | Y         | Z         |
| 1             | 6             | 0           | -2.143062               | 1.774001  | 0.000000  |
| 2             | 1             | 0           | -0.238830               | 2.783798  | 0.000000  |
| 3             | 6             | 0           | -0.764103               | 1.835065  | 0.000000  |
| 4             | 6             | 0           | -2.053268               | -0.653530 | 0.000000  |
| 5             | 6             | 0           | 0.000000                | 0.651882  | 0.000000  |
| 6             | 6             | 0           | -2.781883               | 0.500316  | 0.000000  |
| 7             | 6             | 0           | -0.639099               | -0.608545 | 0.000000  |
| 8             | 7             | 0           | 1.360518                | 0.731756  | 0.000000  |
| 9             | 1             | 0           | -3.866626               | 0.456270  | 0.000000  |
| 10            | 1             | 0           | -2.535487               | -1.624158 | 0.000000  |
| 11            | 6             | 0           | 2.035284                | -0.388530 | 0.000000  |
| 12            | 6             | 0           | 1.381030                | -1.668523 | 0.000000  |
| 13            | 7             | 0           | 0.076371                | -1.761503 | 0.000000  |
| 14            | 7             | 0           | -2.917678               | 2.909317  | 0.000000  |
| 15            | 6             | 0           | 2.182004                | -2.939328 | 0.000000  |
| 16            | 1             | 0           | 2.828834                | -3.001074 | 0.880685  |
| 17            | 1             | 0           | 2.828834                | -3.001074 | -0.880685 |
| 18            | 1             | 0           | 1.502554                | -3.790693 | 0.000000  |
| 19            | 6             | 0           | 3.534765                | -0.303052 | 0.000000  |
| 20            | 1             | 0           | 3.957441                | -0.796900 | 0.880327  |
| 21            | 1             | 0           | 3.957441                | -0.796900 | -0.880327 |
| 22            | 1             | 0           | 3.836257                | 0.743429  | 0.000000  |
| 23            | 1             | 0           | -2.496698               | 3.819263  | 0.000000  |
| 24            | 1             | 0           | -3.918210               | 2.852509  | 0.000000  |

---

---

|                    |      |
|--------------------|------|
| Calculation Type   | SP   |
| Calculation Method | RPM6 |
| Basis Set          | ZDO  |

---

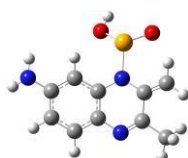

**a1**

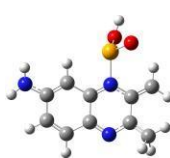

**a2**

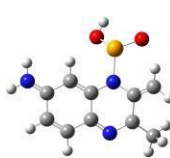

**a3**

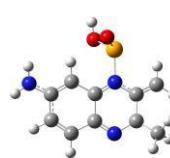

**a4**

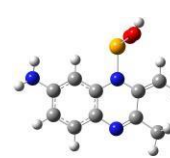

**a5**

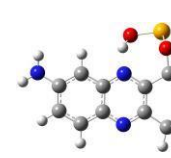

**a6**

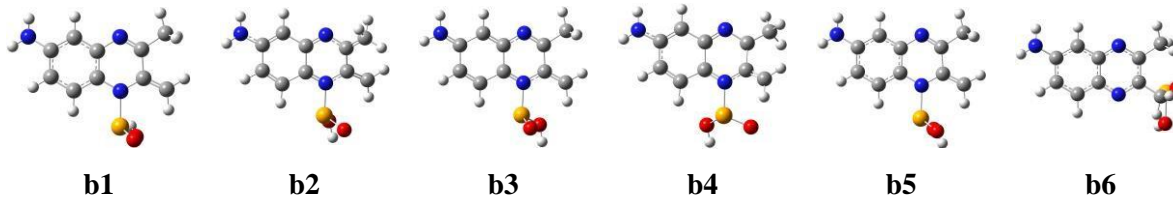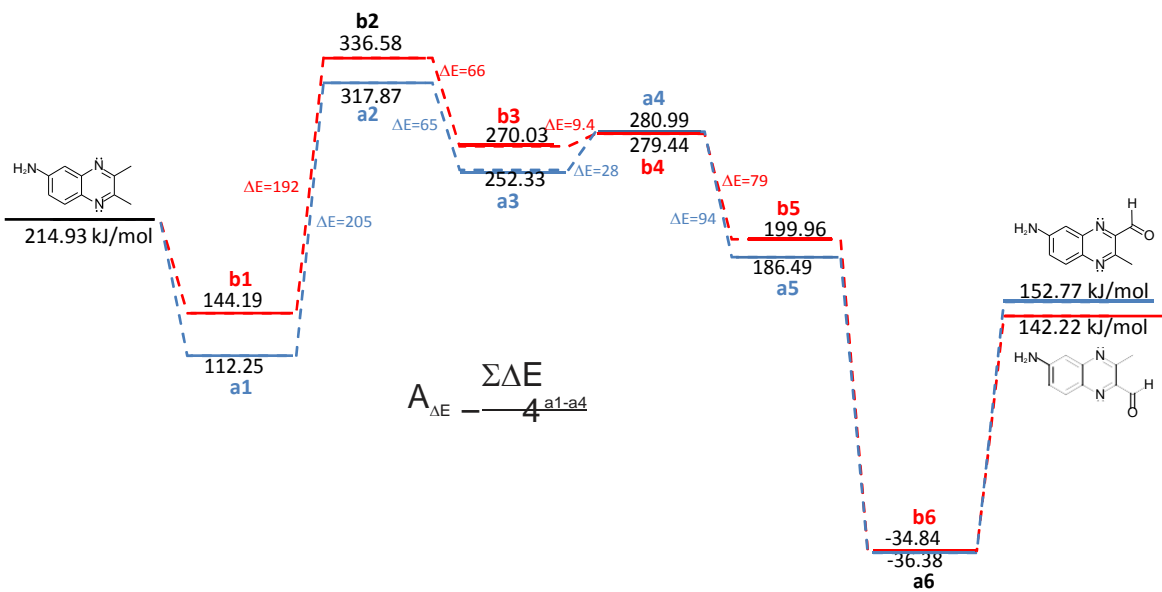

## References

1. K. Marat, SPINWORKS, Version 4.0.3.0, University of Manitoba, Winnipeg MB R3T 2N2, 2011.
2. A. R. Quirt and J. S. Martin, *J. Magn. Reson.*, 1971, **5**, 318-327.
3. K. Wozniak, T. M. Krygowski, B. Kariuki and W. Jones, *Acta Crystallogr., Sect. C*, 1990, **46**, 1946-1947.
4. R. M. Ghalib, R. Hashim, S. H. Mehdi, J. H. Goh and H.-K. Fun, *Acta Crystallogr., Sect. E*, 2010, **66**, o1830-o1831.
5. R. N. Salvatore, J. P. Kass, R. J. P. Gibson, C. H. Zambrano, R. D. Pike and E. E. Dueno, *Acta Crystallogr., Sect. E*, 2006, **62**, o4547-o4548.
6. SPARTAN '08, *Wavefunction, Inc.*, 18401 Von Karman Ave., Suite 370 Irvine, CA 92612, 2009.
7. M. J. Frisch, G. W. Trucks, H. B. Schlegel, G. E. Scuseria, M. A. Robb, J. R. Cheeseman, G. Scalmani, V. Barone, B. Mennucci, G. A. Petersson, H. Nakatsuji, M. Caricato, X. Li, H. P. Hratchian, A. F. Izmaylov, J. Bloino, G. Zheng, J. L. Sonnenberg, M. Hada, M. Ehara, K. Toyota, R. Fukuda, J. Hasegawa, M. Ishida, T. Nakajima, Y. Honda, O. Kitao, H. Nakai, T. Vreven, J. A. Montgomery, Jr., J. E. Peralta, F. Ogliaro, M. Bearpark, J. J. Heyd, E. Brothers, K. N. Kudin, V. N. Staroverov, R. Kobayashi, J. Normand, K. Raghavachari, A. Rendell, J. C. Burant, S. S. Iyengar, J. Tomasi, M. Cossi, N. Rega, M. J. Millam, M. Klene, J. E. Knox, J. B. Cross, V. Bakken, C. Adamo, J. Jaramillo, R. Gomperts, R. E. Stratmann, O. Yazyev, A. J. Austin, R. Cammi, C. Pomelli, J. W. Ochterski, R. L. Martin, K. Morokuma, V. G. Zakrzewski, G. A. Voth, P. Salvador, J. J. Dannenberg, S. Dapprich, A. D. Daniels, O. Farkas, J. B. Foresman, J. V. Ortiz, J. Cioslowski and D. J. Fox. GAUSSIAN 09 (Revision D.01), *Gaussian, Inc.*, Wallingford, CT, 2009.
